# Supplementary material
Source: PubMed Central journal article supplement (PMC8159701)
Supplement: jci-131-146987-s014.pdf [file jci-131-146987-s014.pdf]

# **Tumor restriction by type I collagen opposes tumor-promoting effects of cancer-associated fibroblasts**

Sonakshi Bhattacharjee, Florian Hamberger, Aashreya Ravichandra, Maximilian Miller, Silvia Affo, Ajay Nair, Aveline Filliol, LiKang Chin, Thomas M. Savage, Deqi Yin, Peter A. Sims, Ben Z. Stanger, Kenneth P. Olive, Naita Maren Wirsik, Nicholas Arpaia, Ekihiro Seki, Matthias Mack, Di Zhu, Thomas Schmidt, Rebecca G. Wells, Ingmar Mederacke and Robert F. Schwabe

## **SUPPLEMENTS FILES**

**Supplementary Figures S1-11**

**Supplementary Table S1-S3**

**Supplementary Methods and References**

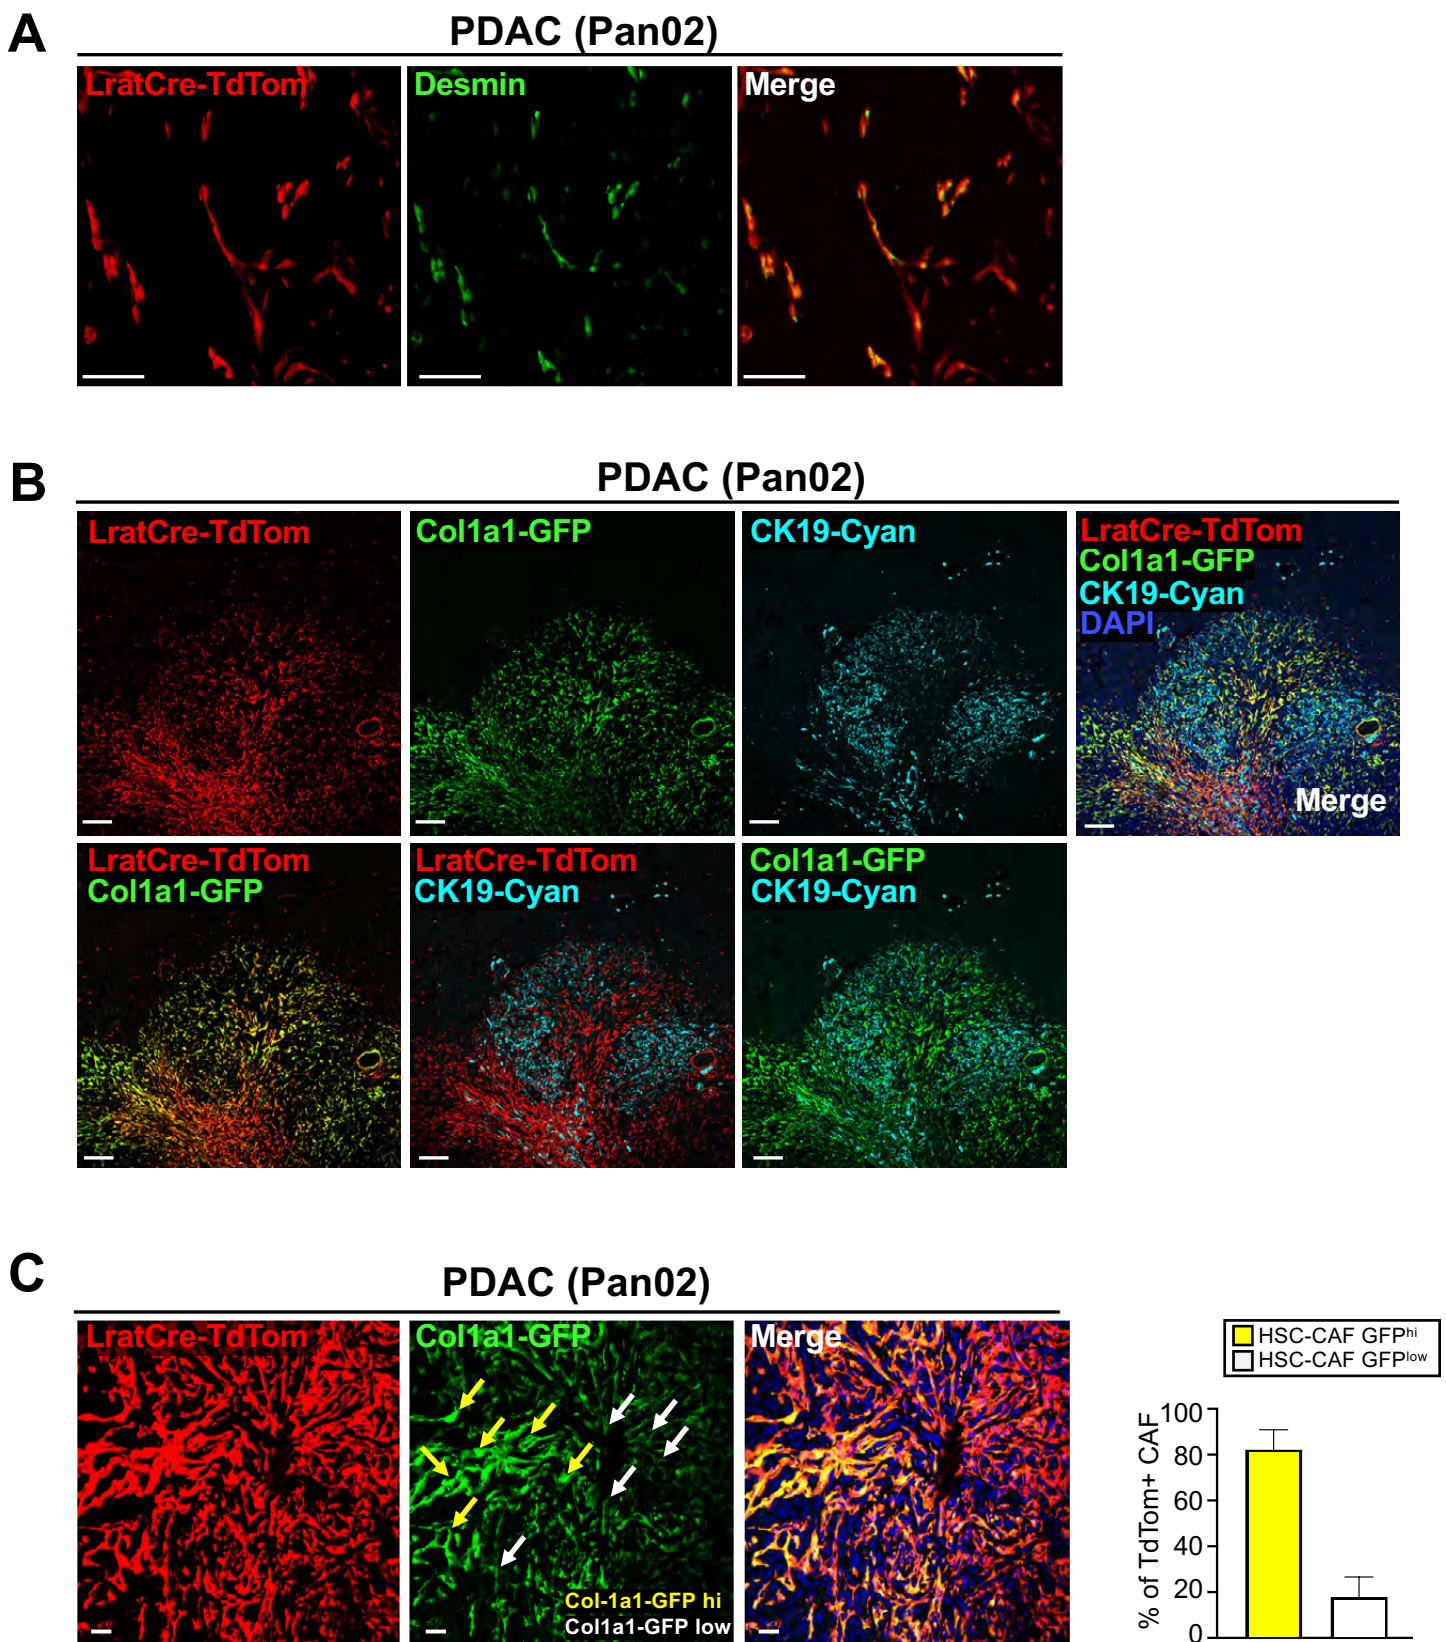

**Fig. S1 | Origin and characterization of CAF.** **A.** Representative image showing colocalization of Lrat-TdTomato with HSC marker desmin in Pan02 liver metastasis. Scale bars, 100 $\mu$ m. **B.** Representative image displaying spatial organization of CK19-positive tumor cells with Lrat-TdTomato and Col1a1-GFP positive CAF in Pan02 liver metastasis. Scale bars, 100  $\mu$ m. **C.** Representative images and quantification from confocal microscopy displaying LratCre-TdTomato and Col1a1-GFP. Col1a1-GFP hi cells are marked with a white arrowhead, Col1a1-GFP low cells are marked with a green arrowhead. n=8, Scale bars, 50  $\mu$ m.

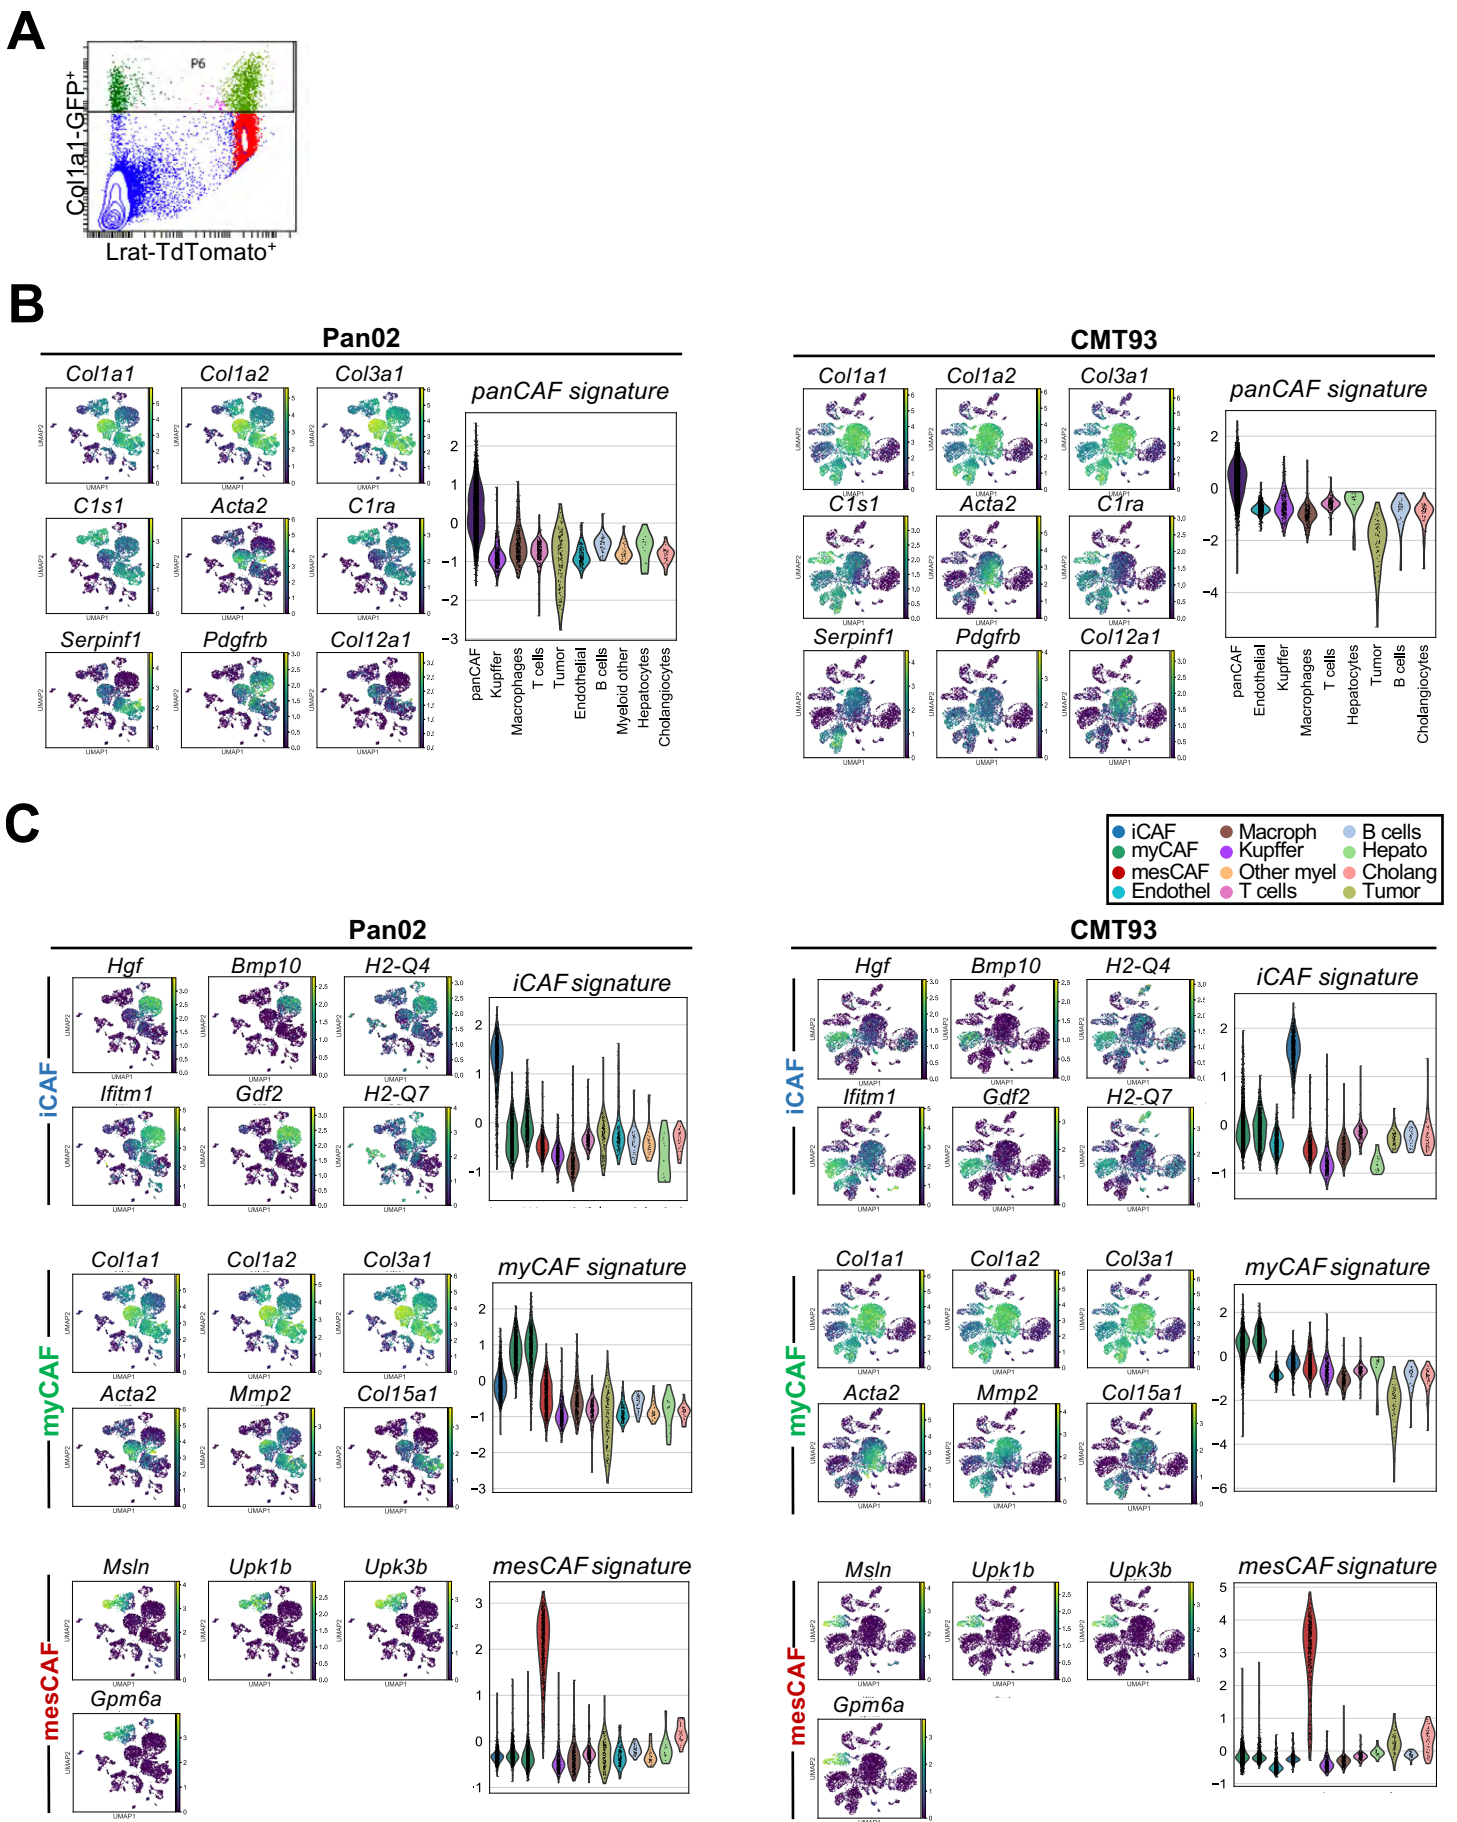

**Fig. S2 | CAF characterization through single cell RNA-sequencing. A.** Gating strategy used to sort CAF-enriched samples. 70% cells were taken from gate P6 (Col1a1-GFP positive) and 30% cells were from the live gate representing other populations. **B.** UMAPs showing genes used to determine panCAF signature in Pan02 and CMT93 liver metastasis model. **C.** iCAF, myCAF and mesCAF signatures and corresponding violin plots displaying all clusters with scores for iCAF, myCAF and mesCAF for Pan02 and CMT93 liver metastasis.

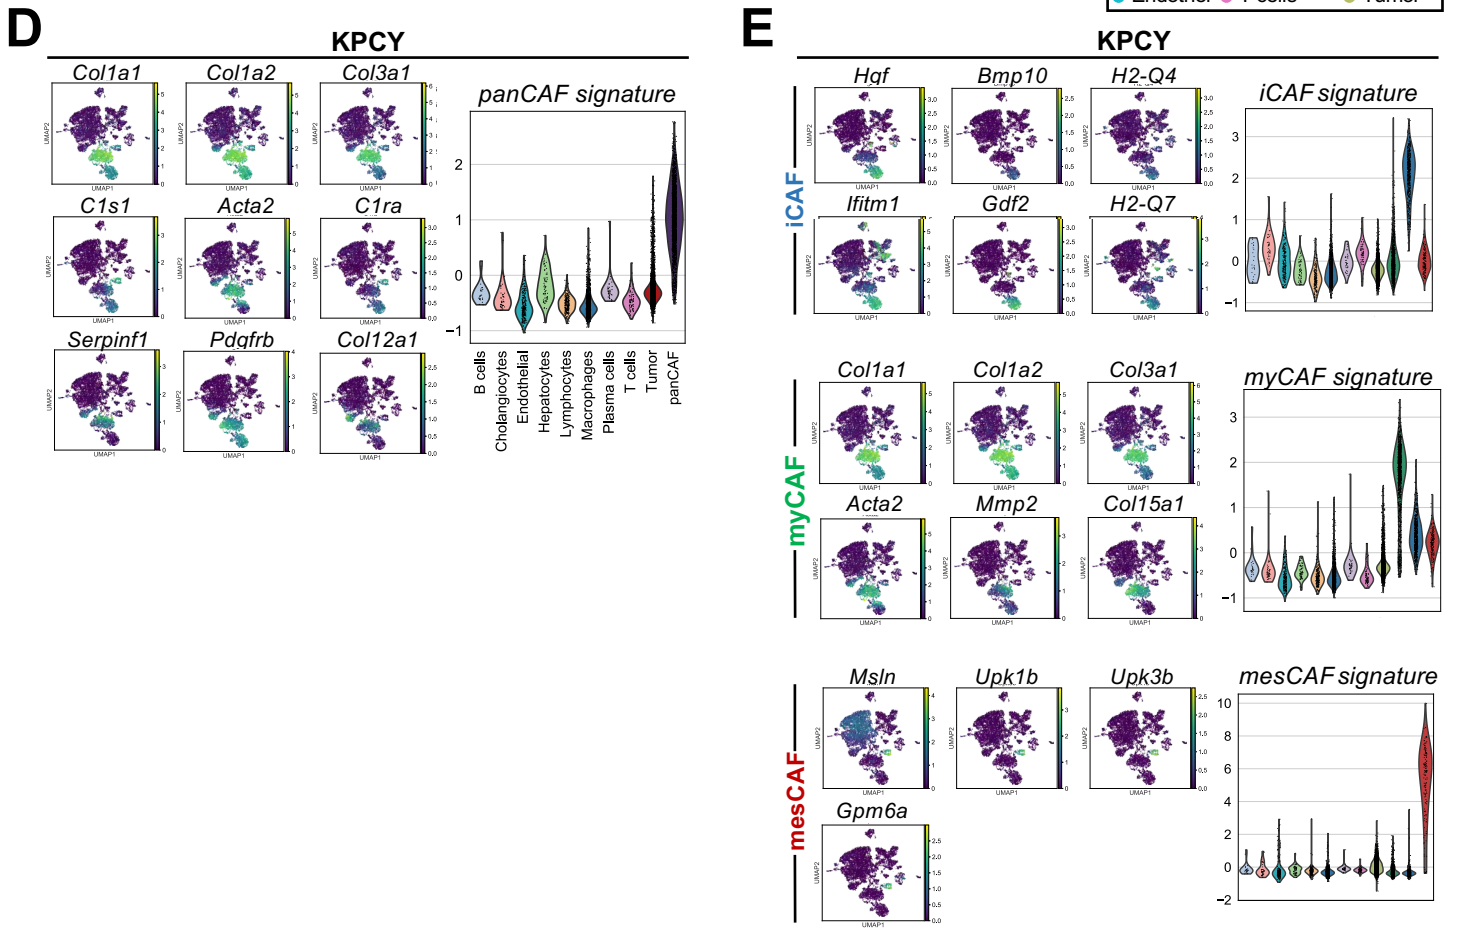

**Fig. S2 | CAF characterization through single cell RNA-sequencing (continued).** **D.** UMAPs showing genes used to determine panCAF signature in KPCY liver metastasis model. **E.** iCAF, myCAF and mesCAF signatures and corresponding violin plots displaying all clusters with scores for iCAF, myCAF and mesCAF for KPCY liver metastasis.

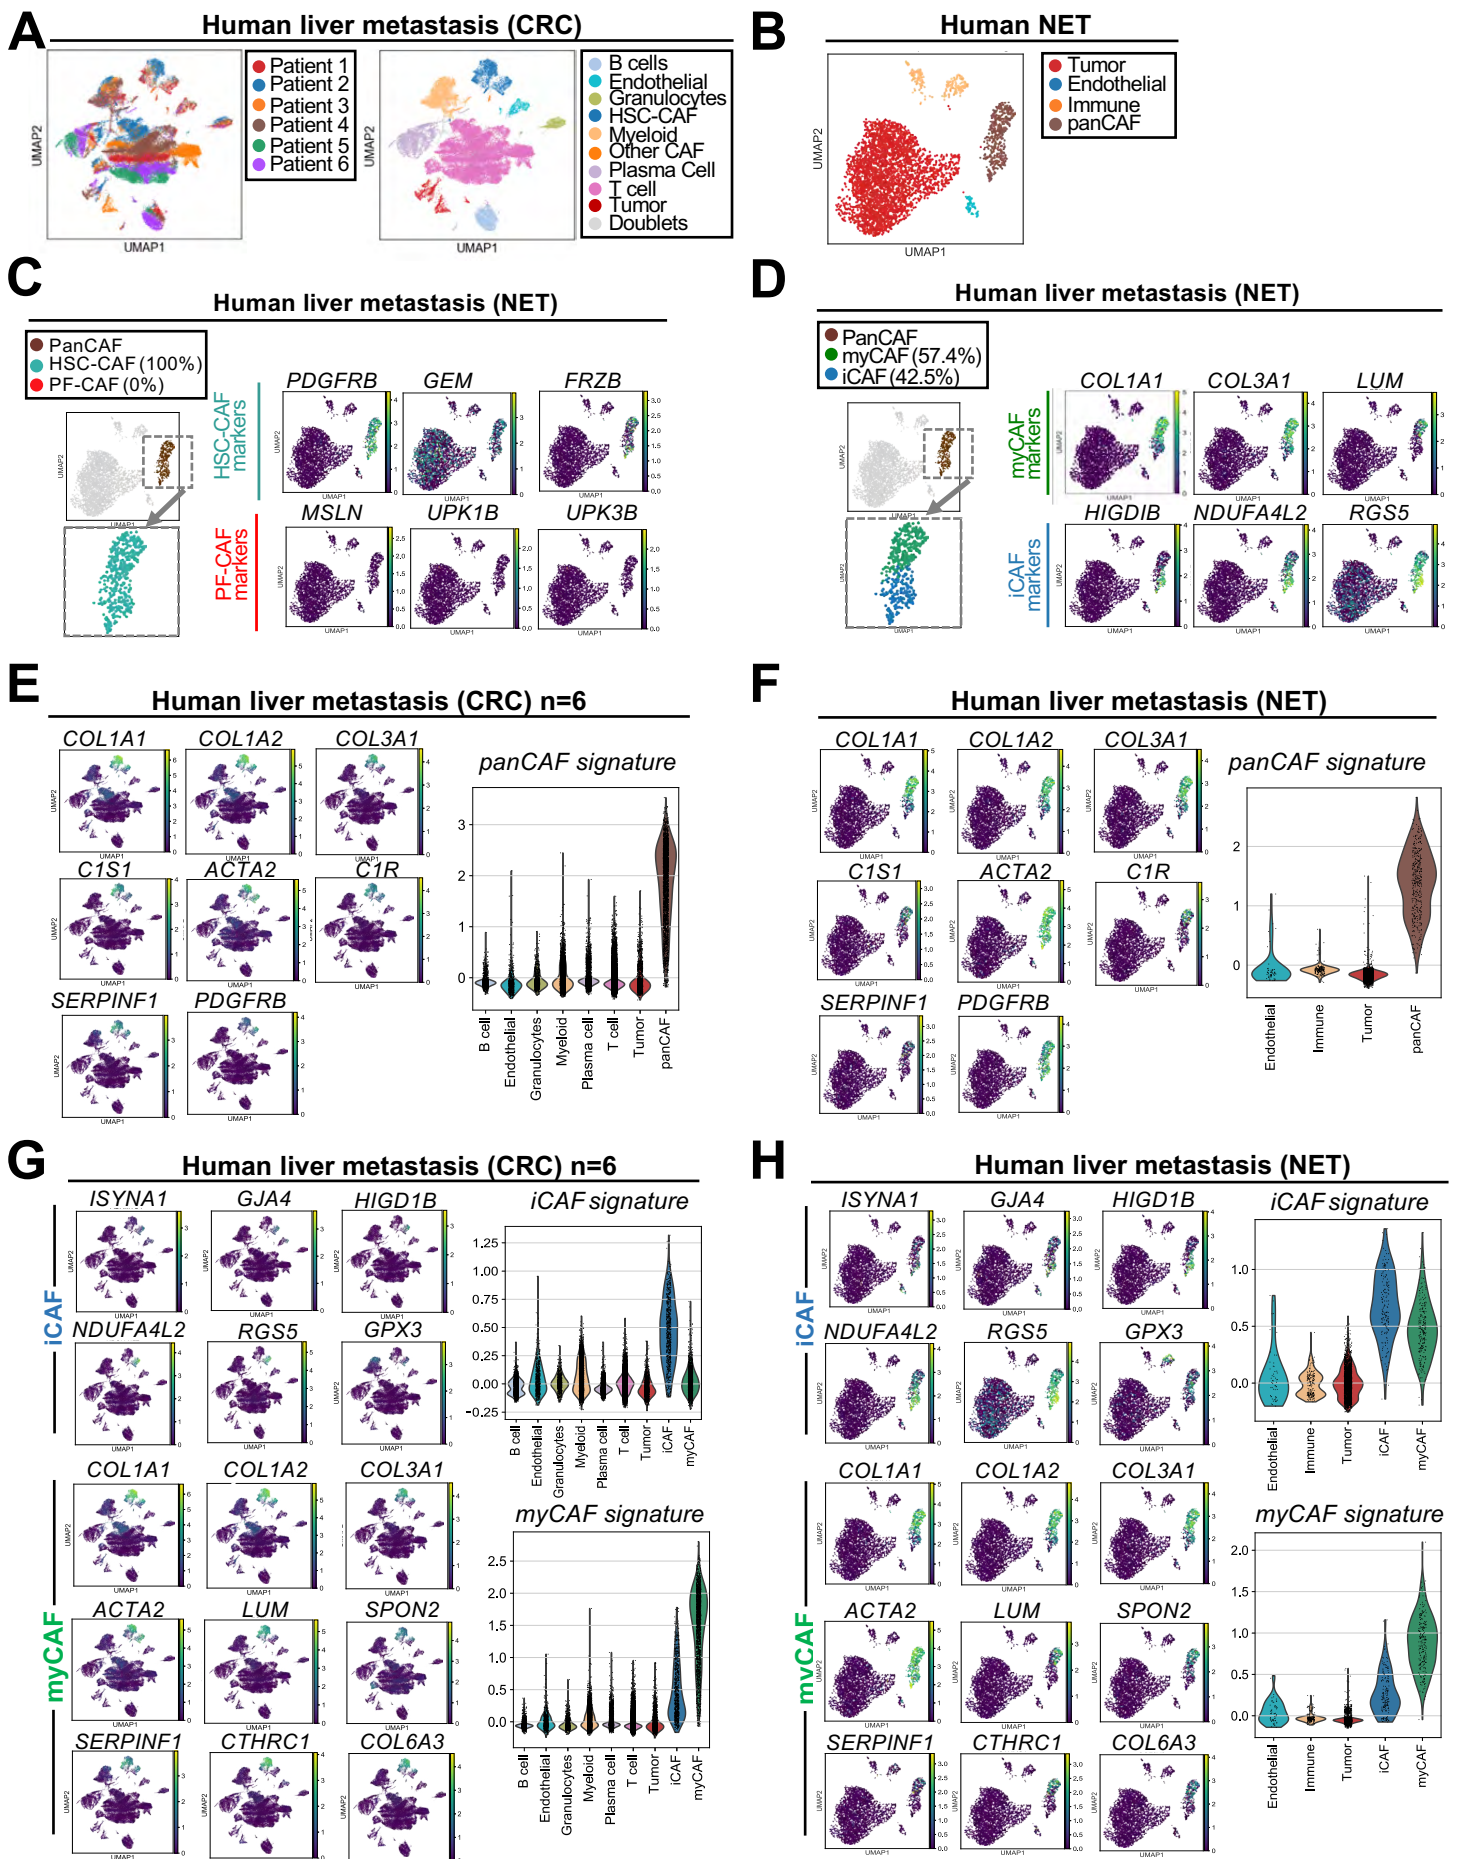

**Fig. S3 | CAF characterization through single cell RNA-sequencing in human liver metastasis.** **A.** UMAP showing cluster distribution of samples from 6 CRC liver metastasis patients **B.** UMAP displaying all cell populations acquired in 1 human small intestinal neuroendocrine tumor (NET) liver metastasis sample. **C.** UMAPs of scRNA-seq of NET metastasis, displaying HSC and PF as a percentage of panCAF; human HSC markers *PDGFRB*, *GEM*, *HAND2*, *LUM* and human PF markers *MSLN* and *UPK1B*. **D.** UMAPs showing percentages and markers of myCAF and iCAF subpopulations for human NET liver metastasis. **E-F.** UMAPs showing genes used to determine panCAF signature and violin plots showing the clusters with panCAF scores for human CRC (**E**, n=6) and NET (**F**, n=1) liver metastasis **G-H.** UMAPs showing genes used to determine iCAF, myCAF and mesCAF signatures and corresponding violin plots displaying all clusters with scores for iCAF, myCAF and mesCAF for human CRC (**G**, n=6) and NET liver metastasis (**H**, n=1).

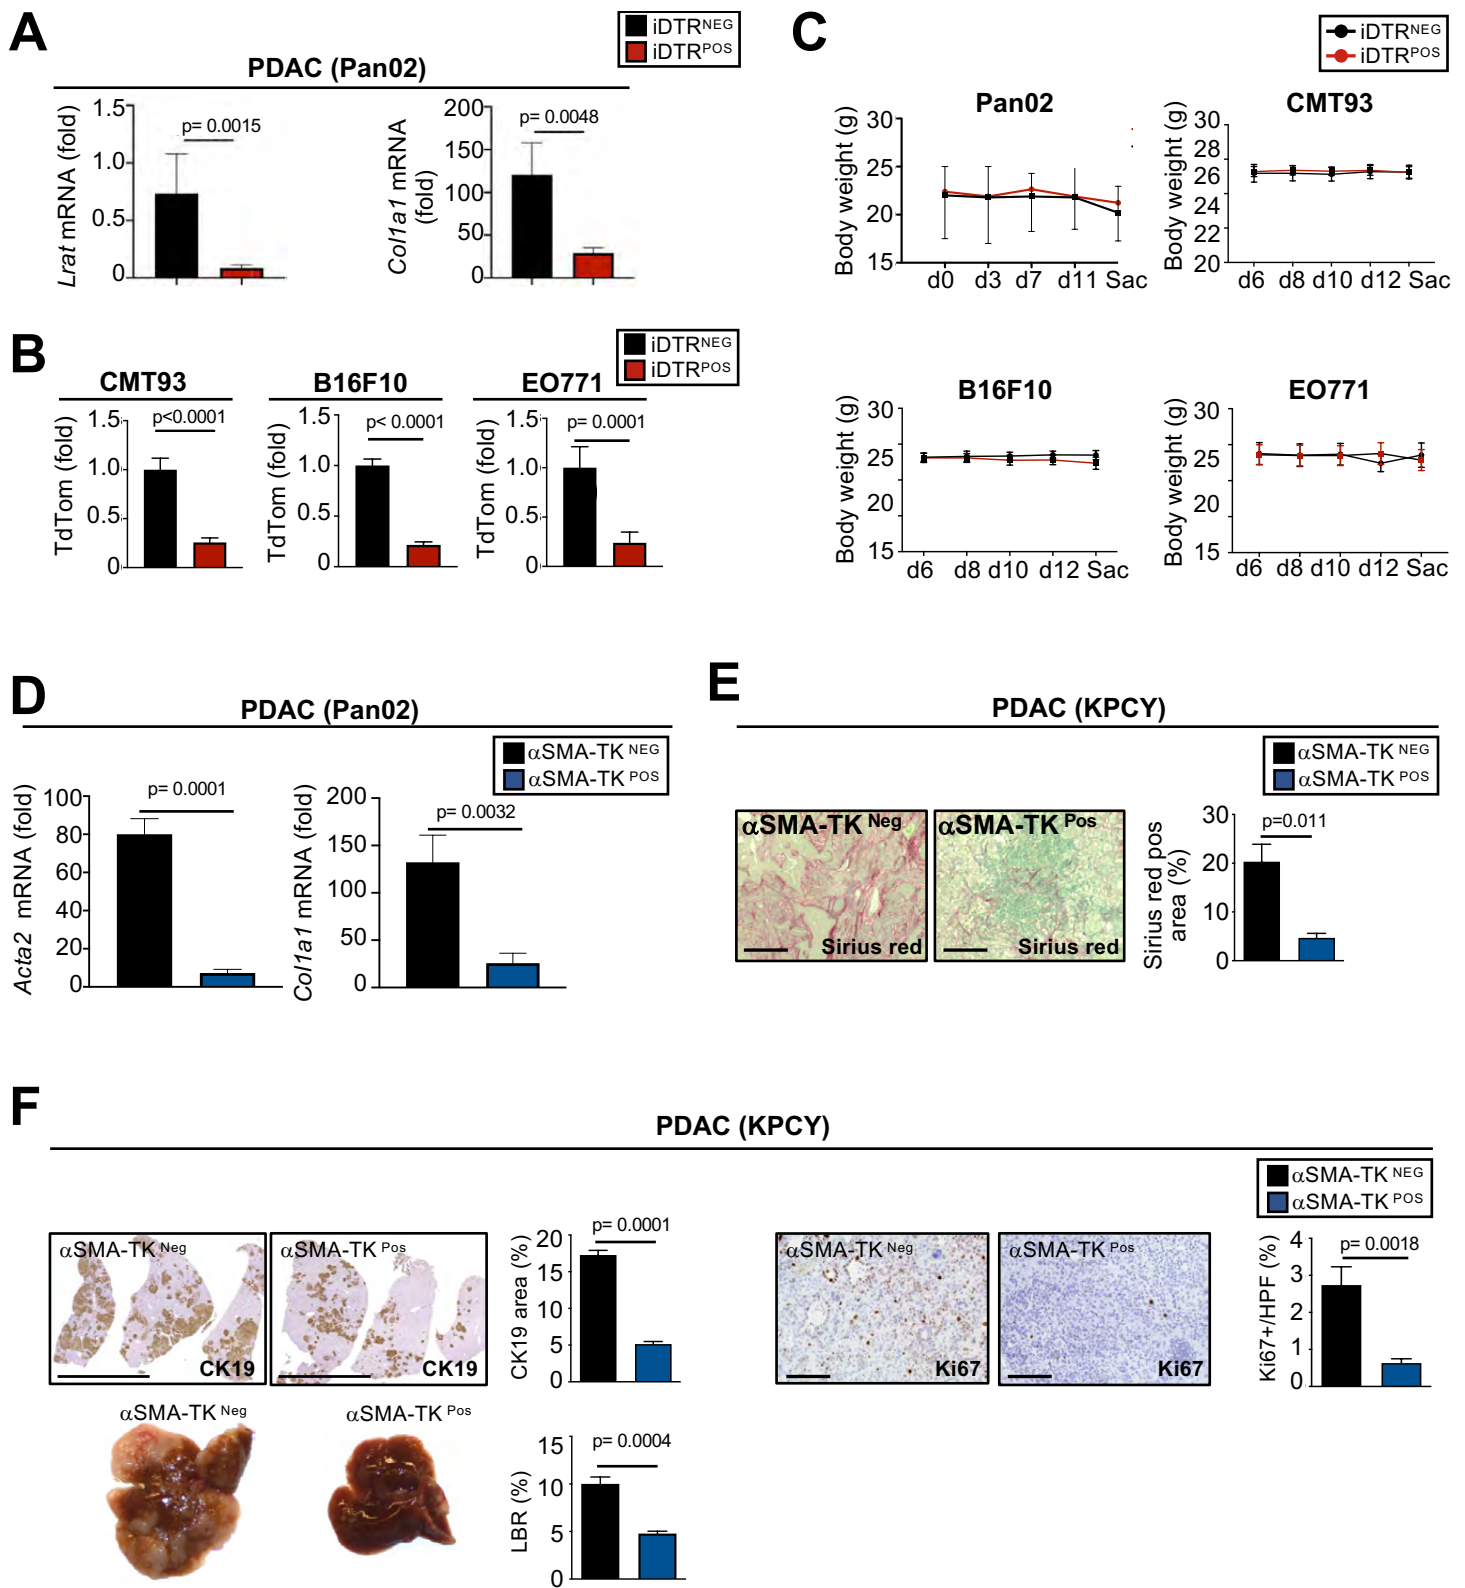

**Fig. S4 | CAF promote desmoplastic tumor growth.** HSC-CAF depletion via DT injection (0.5 ng/g) in *Lrat*Cre<sup>+</sup> TdTom<sup>+</sup>, iDTR<sup>+</sup> or *Lrat*Cre<sup>+</sup> TdTom<sup>+</sup> iDTR<sup>-</sup> littermates. **A.** mRNA levels of *Lrat* and *Colla1* are reduced within tumor tissue in *Lrat*Cre<sup>+</sup> TdTom<sup>+</sup>, iDTR<sup>+</sup> compared to *Lrat*Cre<sup>+</sup> TdTom<sup>+</sup> iDTR<sup>-</sup> littermates. mRNA levels are shown as fold induction in comparison to normal liver tissue. **B-C.** DT injection reduces TdTom expression (B) but did not reduce body weight (C). **D.** mRNA levels of *Acta2* and *Colla1* are reduced within tumor tissue in  $\alpha$ SMA-TK positive mice compared to  $\alpha$ SMA-TK negative littermates in the Pan02 metastasis model (n=6-10 mice/group). mRNA levels are shown as fold induction in comparison to normal liver tissue. **E-F.**  $\alpha$ SMA-TK positive mice and  $\alpha$ SMA-TK negative littermates were injected intrasplenically with KPCY cells. Representative Sirius red images and quantification (E, n=9-13 mice/group). Scale bars, 100  $\mu$ m. Representative macroscopic and CK19 IHC images of liver, liver body weight ratio (LBR), tumor area quantifications and Ki67 quantifications (n=7 mice/group). Scale bars, 1cm (CK19) and 100  $\mu$ m (Ki67). Statistics were done by two-tailed unpaired T-test or Mann Whitney-U. Data are displayed as mean  $\pm$  SEM

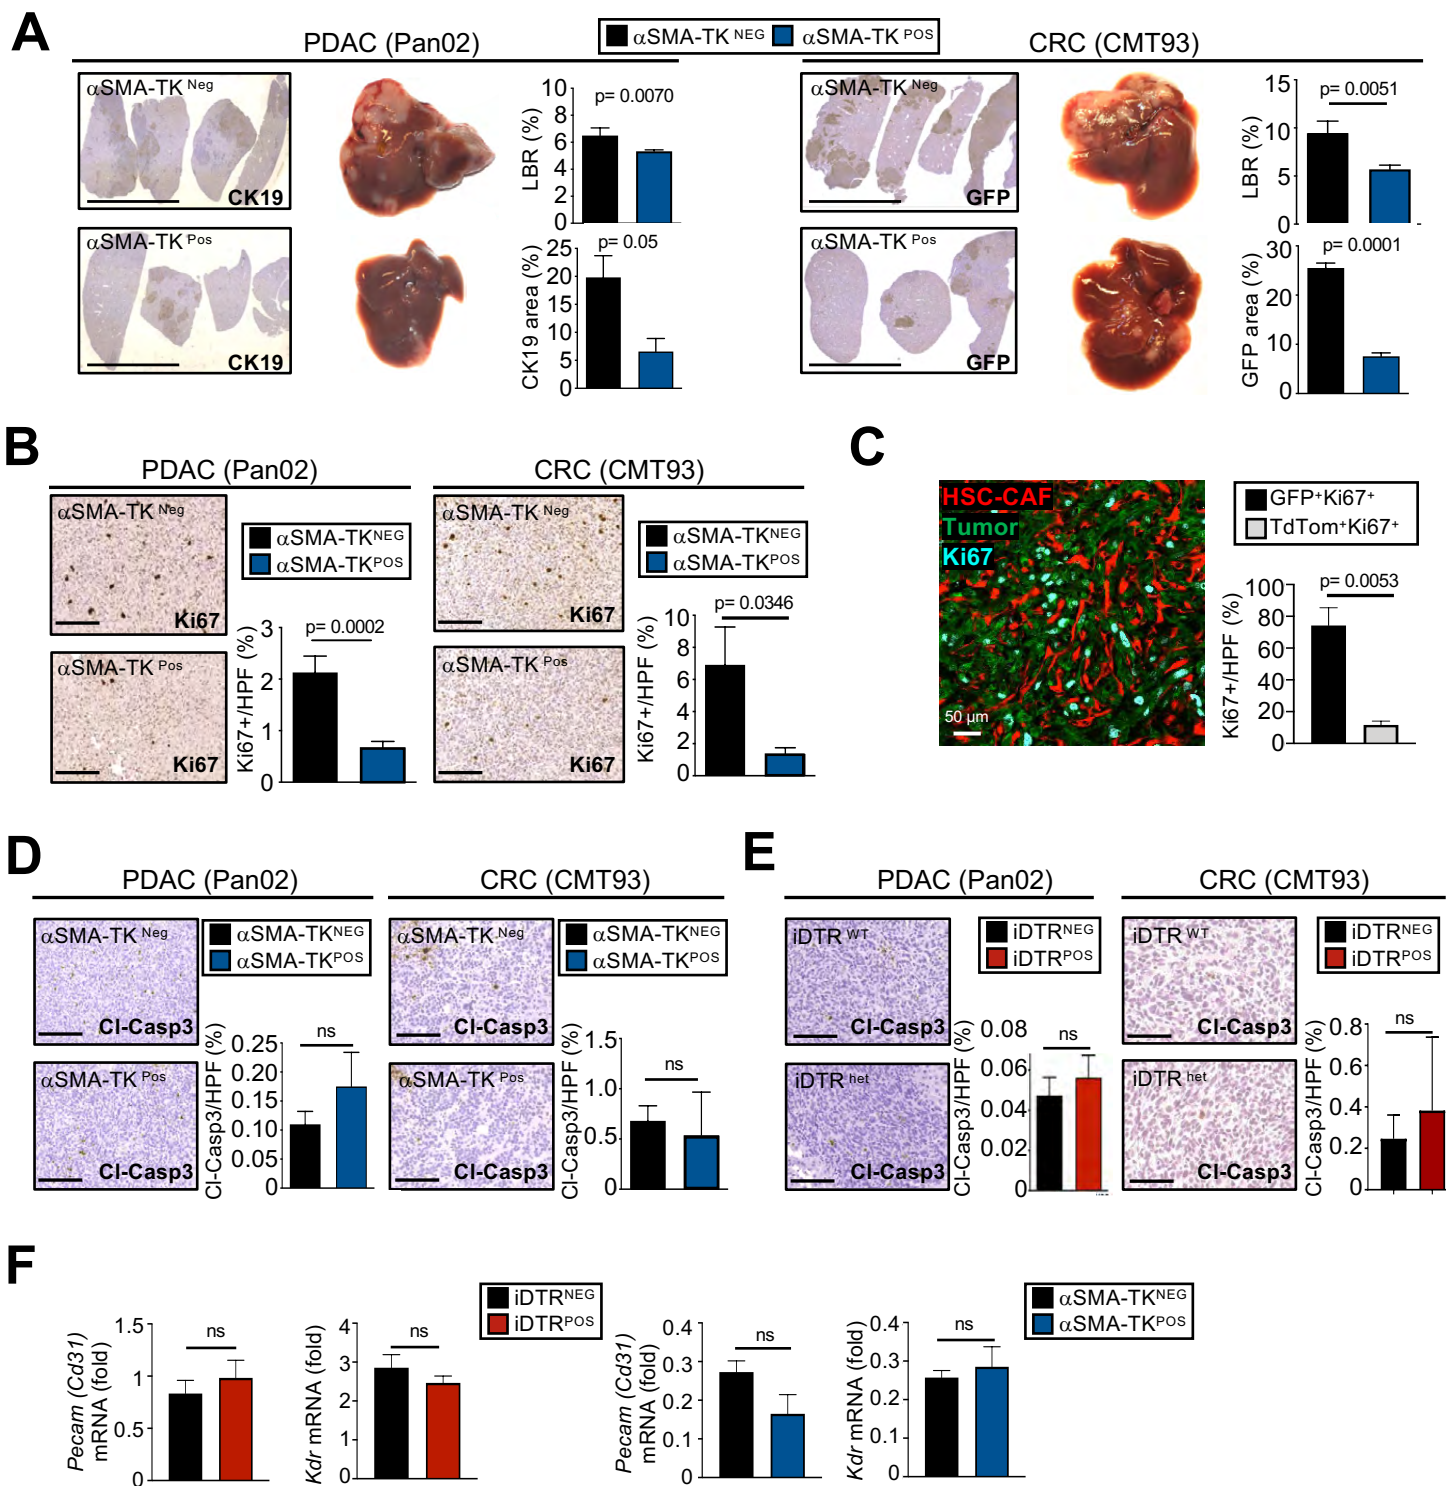

**Fig. S5 | CAF promote tumor cell proliferation.** A-B. Effect of  $\alpha$ SMA-TK-mediated CAF depletion in  $\alpha$ SMA-TK positive mice and  $\alpha$ SMA-TK negative littermates (n=7-8 mice per group) on metastatic growth of Pan02 and CMT93 metastasis. Ganciclovir injections were administered daily from day 10 to day 13. Representative macroscopic and IHC images of liver, liver body weight ratio (LBR) and tumor area quantifications of  $\alpha$ SMA-TK positive mice and  $\alpha$ SMA-TK negative littermates (B), scale bars, 1 cm. Representative IHC images and quantification of Ki67+ cells (B); scale bars, 100  $\mu$ m. C. Representative IF images and quantification of Ki67+ GFP+ cells compared to Ki67+TdTom+HSC cells in the Pan02 model in LratCre+ TdTom+ mice; scale bars, 50  $\mu$ m. D-E. Representative IHC images and quantification of cleaved caspase 3+ cells in Pan02 and CMT93 models in  $\alpha$ SMA-TK positive mice and  $\alpha$ SMA-TK negative littermates as described in A-B; scale bars, 100  $\mu$ m. F. mRNA levels of *Pecam* and *Kdr* in  $\alpha$ SMA-TK and Lrat-iDTR mice in the Pan02 model. mRNA levels are shown as fold induction in comparison to normal liver tissue (n=6-10 per group). Statistics were done by two-tailed unpaired T-test or Mann Whitney-U. Data are displayed as mean  $\pm$  SEM, ns stands for p value not significant.

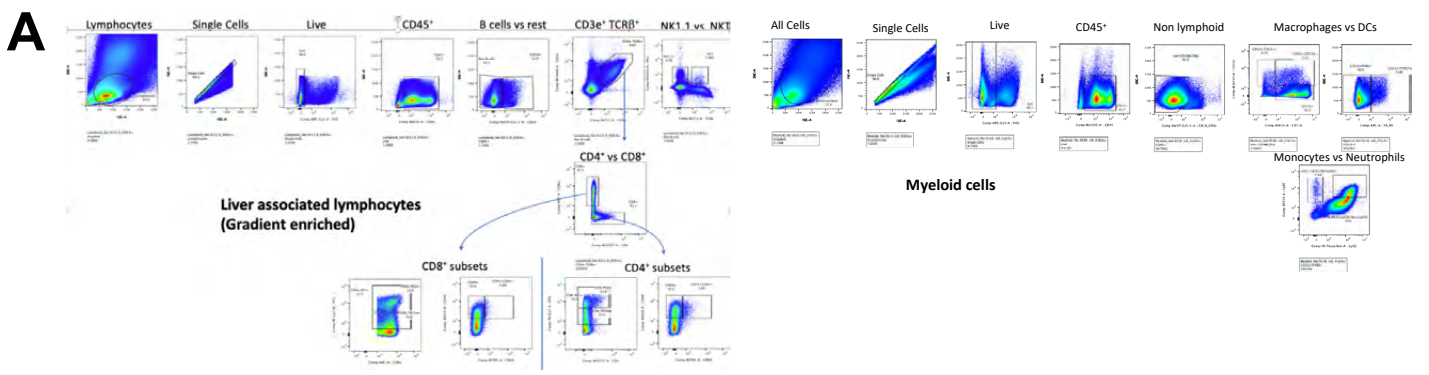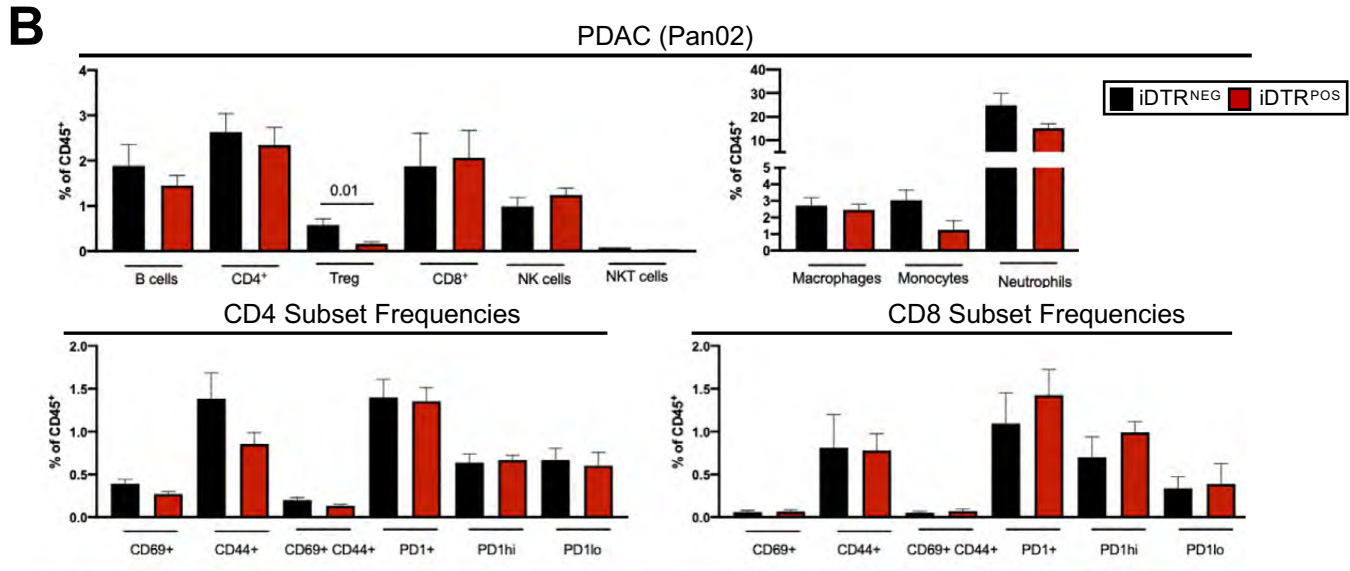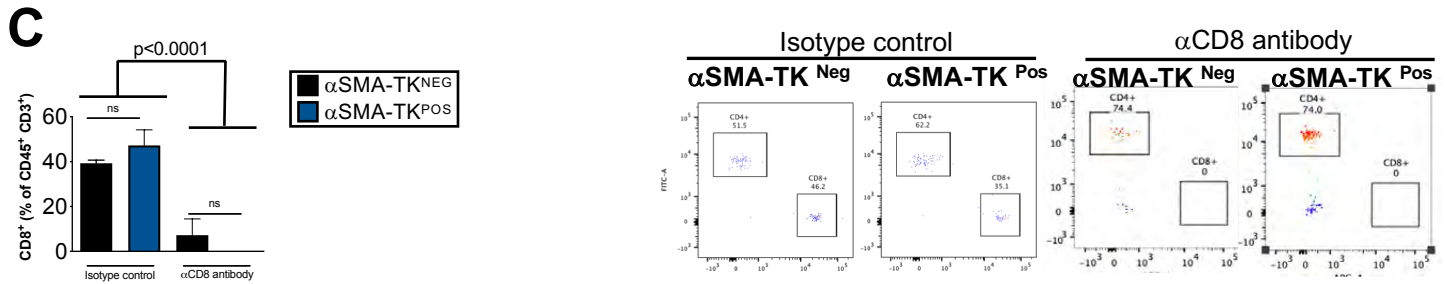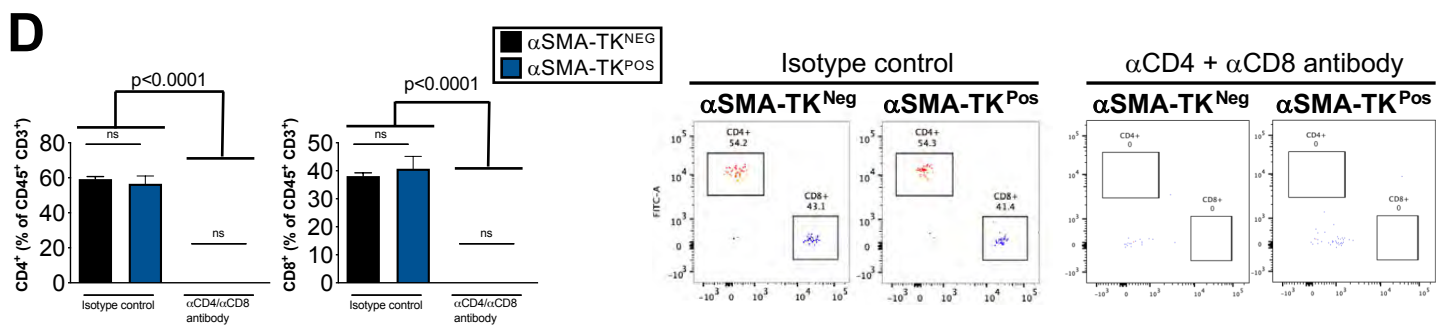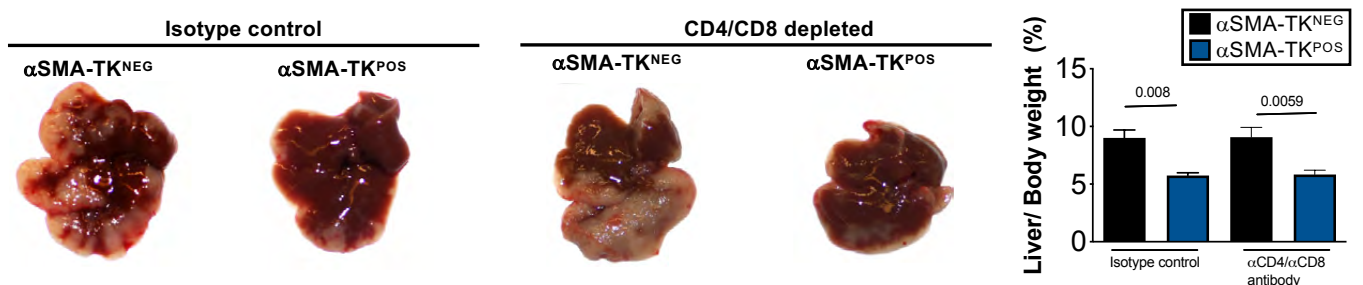

**Fig. S6 | Immune cell characterization in HSC-CAF depleted mice and CD8-depleted mice with liver metastasis. A.** Gating strategy of immune cells isolated from tumors from HSC-CAF depletion via DT injection (0.5 ng/g) at day 7 and day 10 in LratCre+ TdTom+, iDTR+ or LratCre+ TdTom+ iDTR- littermates. **B.** Immune cell population proportions as percent of CD45+ cells, **C.** Depletion efficiency of CD8 antibodies analyzed in blood samples collected from animals treated with antibody versus isotype control. **D.** CD4 and CD8 T-cell depletion or isotype injection in alphaSMA-TK mice injected with ganciclovir (i.p. 10 mg/kg) to deplete CAF simultaneously. Pan02 liver metastasis in alphaSMA-TK mice with representative macroscopic images of liver and liver body weight ratio (LBR) (n=5mice/group).



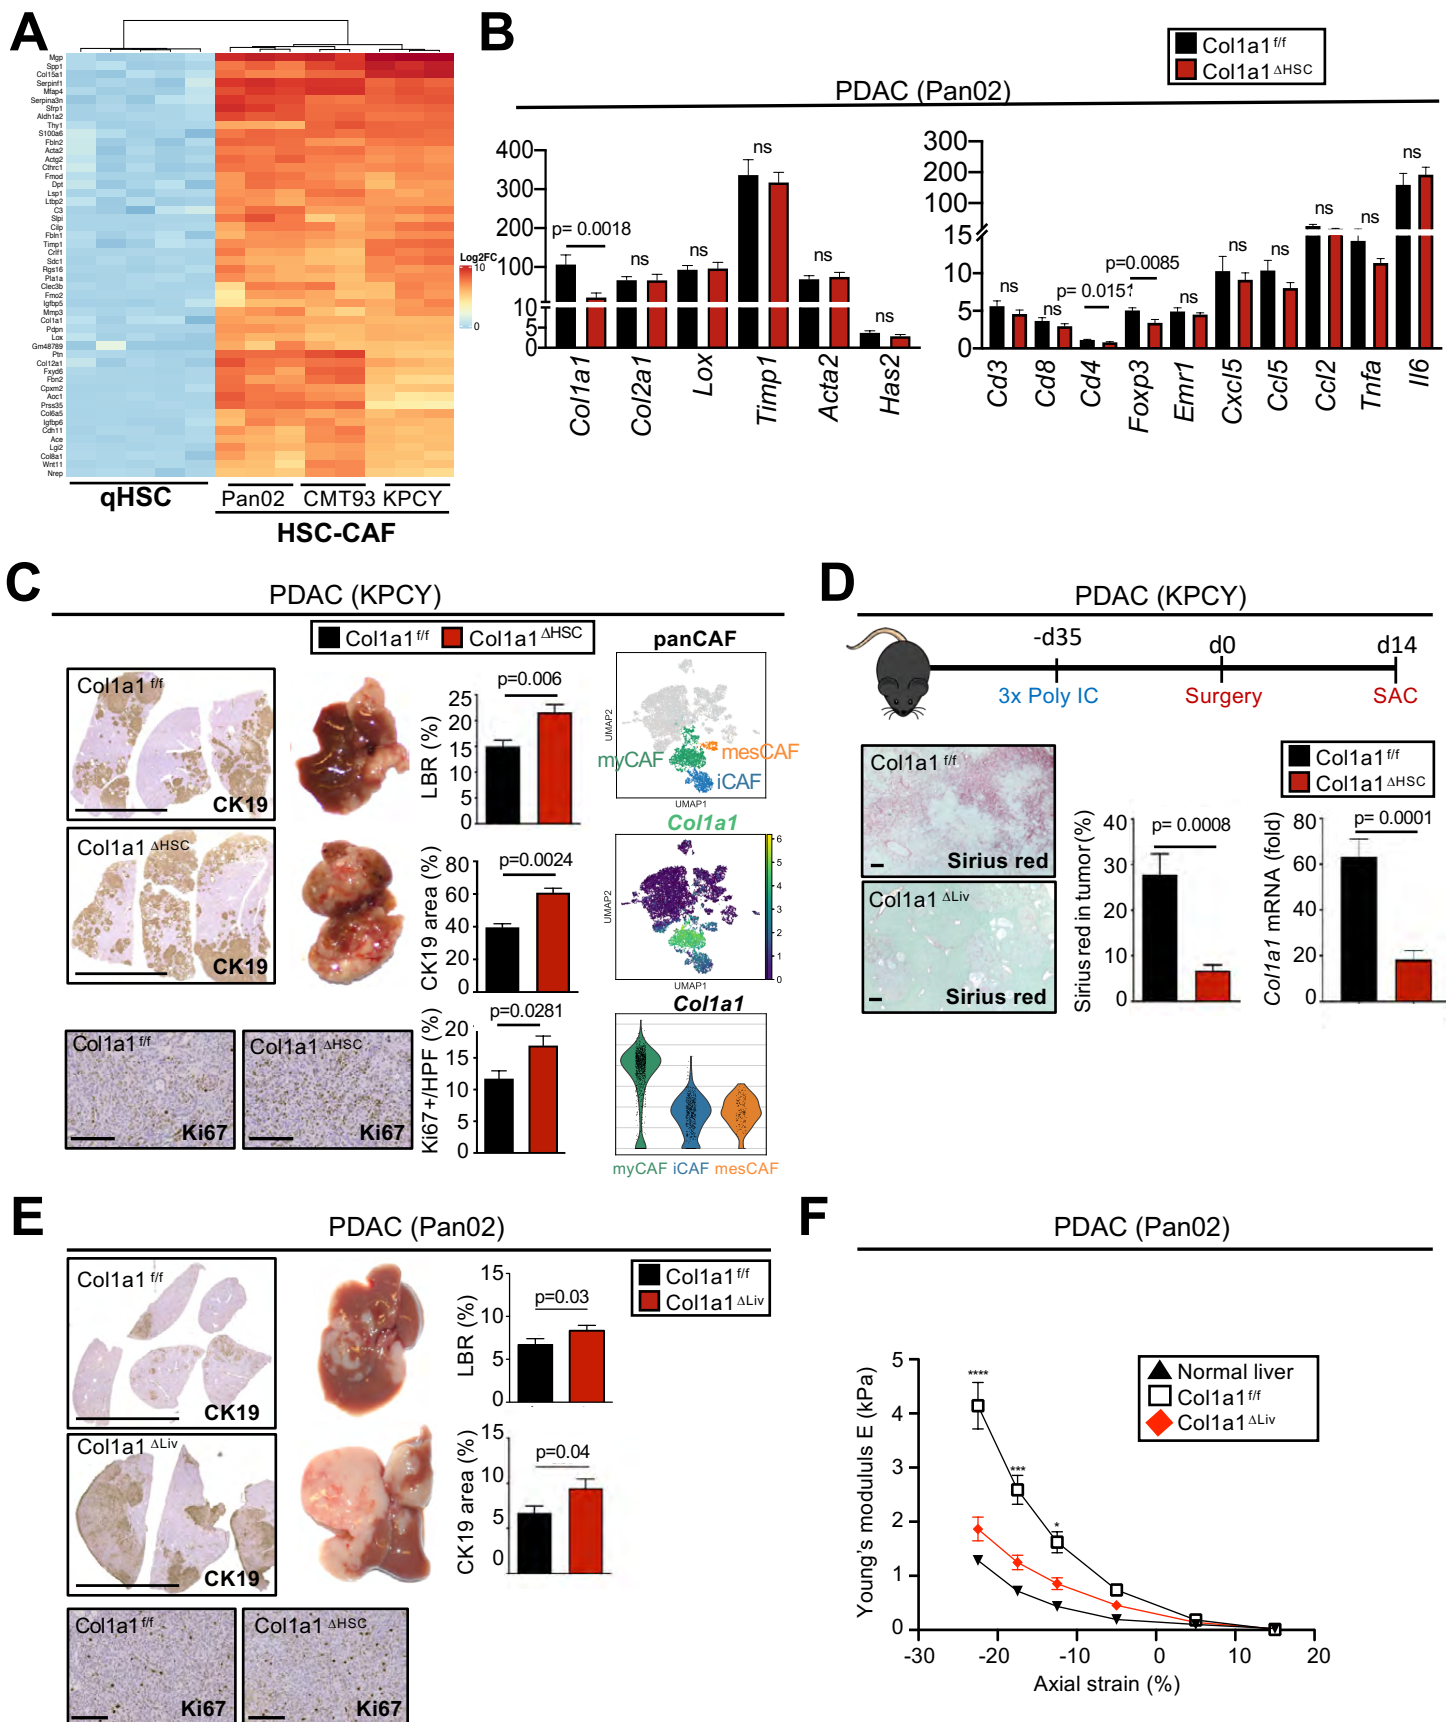

**Fig. S7 | *Col1a1* is strongly upregulated in CAF and its deletion promotes metastatic tumor growth while decreasing stiffness. A.** Bulk RNA sequencing of purified quiescent HSC vs HSC-CAF shows top differentially expressed genes in HSC-CAF from Pan02, CMT93 and KPCY as ECM-associated. Top differentially expressed genes organized by log<sub>2</sub>fold change. **B.** mRNA levels of fibrosis-associated and immune cell-associated genes in *Col1a1<sup>fl/fl</sup>* vs *Col1a1<sup>ΔHSC</sup>* mice in the Pan02 model. mRNA levels are shown as fold induction in comparison to normal liver tissue. **C.** UMAPs and gene signatures of myCAF and *Col1a1* in KPCY (n=1). Representative macroscopic and IHC images of liver, liver body weight ratio (LBR), tumor area quantifications Ki67 quantifications (n=7 mice/group) injected with KPCY cells in *Col1a1<sup>fl/fl</sup>* vs *Col1a1<sup>ΔHSC</sup>* mice. Scale bars, 1cm (CK19) and 100μm (Ki67). **D.** Sirius red (n= 10-12 mice/group) of Mx1Cre-induced *Col1a1* deletion. Scale bars, 100 μm. **E.** Representative macroscopic and IHC images of liver, liver body weight ratio (LBR), tumor area quantifications Ki67 quantifications (n=10-12 mice/group) injected with Pan02 cells in Mx1Cre<sup>pos</sup> x *Col1a1<sup>fl/fl</sup>* (*Col1a1<sup>ΔLiv</sup>*) vs *Col1a1<sup>fl/fl</sup>* littermates. Scale bars, 1cm (CK19) and 100 μm (Ki67). **F.** Rheometry measurements in Mx1Cre<sup>pos</sup> x *Col1a1<sup>fl/fl</sup>* (*Col1a1<sup>ΔLiv</sup>*) mice injected with Pan02 cells showing reduced stiffness in comparison to *Col1a1<sup>fl/fl</sup>* littermates. Statistics were done by two-tailed unpaired T-test or Mann Whitney-U. Data are displayed as mean ± SEM

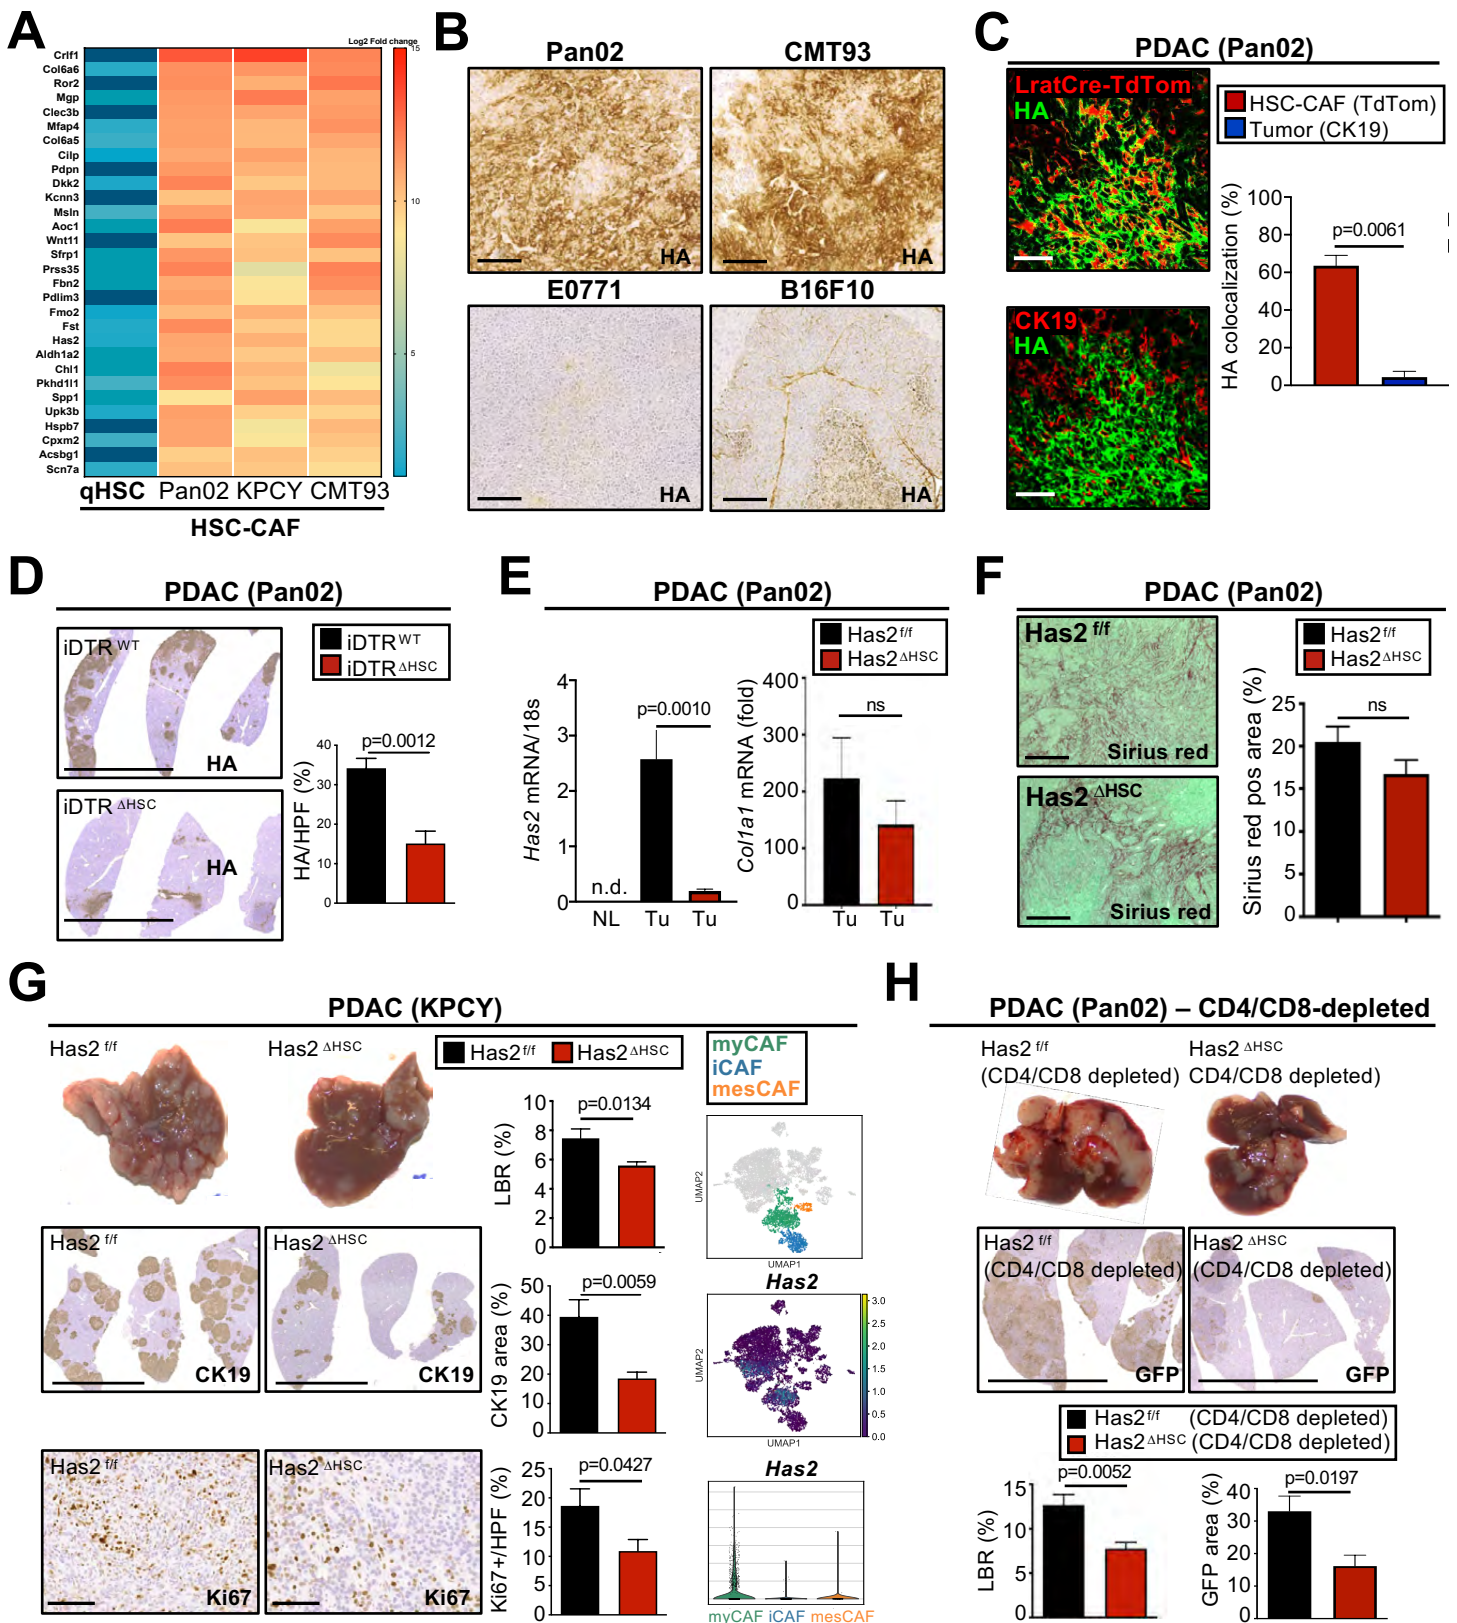

**Fig. S8 | Hyaluronan promotes tumor cell growth.** (A) Bulk RNAseq data comparing top 30 differentially expressed genes between qHSC (from normal liver) and CAF derived from Pan02 (n=3), KPCY (n=3) and CMT93 (n=2) models. Genes organized by pAdj value relative to quiescent sample. (B) HA staining in desmoplastic Pan02 and CMT93 as well as non-desmoplastic E0771 and B16F10 liver metastasis. Scale bars, 100  $\mu$ m (C) The majority of HA colocalizes with LratCre x TdTTom-positive HSC and not to CK19-positive tumor cells. Scale bar, 50 $\mu$ m (D) HA staining in LratCre<sup>pos</sup> TdTTom<sup>pos</sup> iDTR<sup>pos</sup> mice or LratCre<sup>pos</sup> TdTTom<sup>pos</sup> iDTR<sup>neg</sup> littermates, treated with 3x injections of DT (0.5 ng/g) reveals significantly reduced HA in HSC-CAF-depleted mice. Scale bar, 1cm (E) mRNA levels of Has2 are significantly decreased within tumor tissue in Has2<sup>ΔHSC</sup> mice compared to Has2<sup>fl/fl</sup> mice injected intra-splenically with Pan02 cells, and not detected (“n.d.”) in normal liver. *Coll1a1* mRNA levels are shown as fold induction in comparison to normal liver tissue and not altered by Has2 deletion. Tu= Tumor, NL= Normal liver (F) Sirius red staining reveals no differences in fibrosis between Has2<sup>fl/fl</sup> vs Has2<sup>ΔHSC</sup> mice. Scale bars, 100  $\mu$ m (G) UMAPs and gene signatures of myCAF and *Has2* in KPCY (n=1). Representative macroscopic and IHC images of liver, the liver body weight ratio (LBR), tumor area and Ki67 quantifications (n=7-8 per group each) in Has2<sup>fl/fl</sup> vs Has2<sup>ΔHSC</sup> mice in the KPCY liver metastasis model. Scale bars, 1 cm (CK19) and 100  $\mu$ m (Ki67). (H) To determine if CD4 and CD8 T cells were needed for tumor modulatory effects of HA, we investigated tumor development in the Pan02 liver metastasis model in Has2<sup>fl/fl</sup> vs Has2<sup>ΔHSC</sup> mice that were depleted of CD4+ and CD8+ T cell by antibody injections day 6 and day 11. Shown are macroscopic and IHC images of liver, liver body weight ratio (LBR) and tumor area quantifications. Scale bars, 1 cm. Statistics were done by two-tailed unpaired T-test or Mann Whitney-U. Data are displayed as mean  $\pm$  SEM, ns stands for p value not significant.

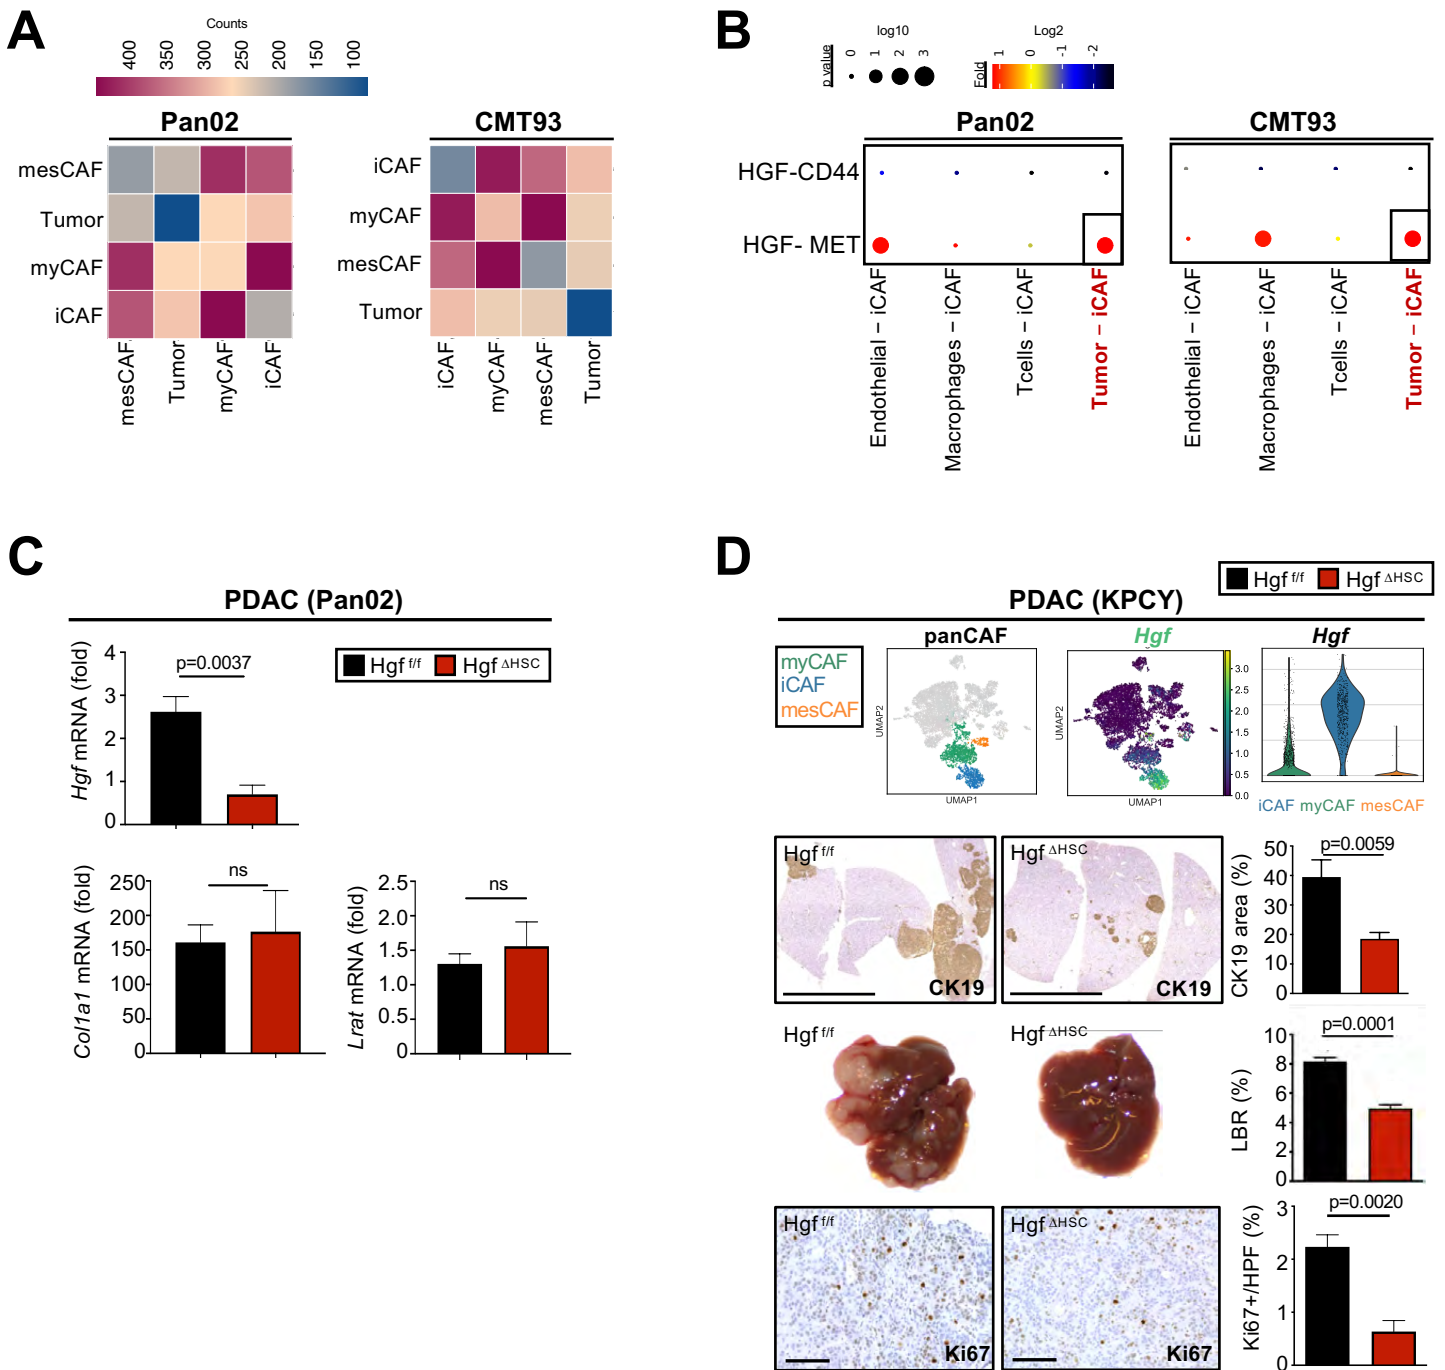

**Fig. S9 | CAF expressed HGF links to tumor expressed MET and promotes tumor growth.** **A.** CellphoneDB analysis showing ligand-receptor interactions between tumor cells with CAF subpopulations- iCAF, myCAF and mesCAF. **B.** CellphoneDB analysis showing all Hgf-receptor interactions for iCAF against all populations. **C.** mRNA levels of *Lrat* and *Col1a1* are unchanged within tumor tissue in *Hgf*<sup>ΔHSC</sup> mice compared to *Hgf*<sup>fl/fl</sup> mice injected with Pan02 cells. mRNA levels are shown as fold induction in comparison to normal liver tissue. **D.** UMAPs and gene signatures of iCAF and *Hgf* in KPCY (n=1). Representative macroscopic and CK19 and Ki67 IHC images of liver, liver body weight ratio (LBR), tumor area and Ki67 quantifications (n=4 per group each) in the KPCY model of liver metastasis. Statistics were done by two-tailed unpaired T-test or Mann Whitney-U. Data are displayed as mean ± SEM. Scale bars 1 cm (CK19) and 100 μm (Ki67).

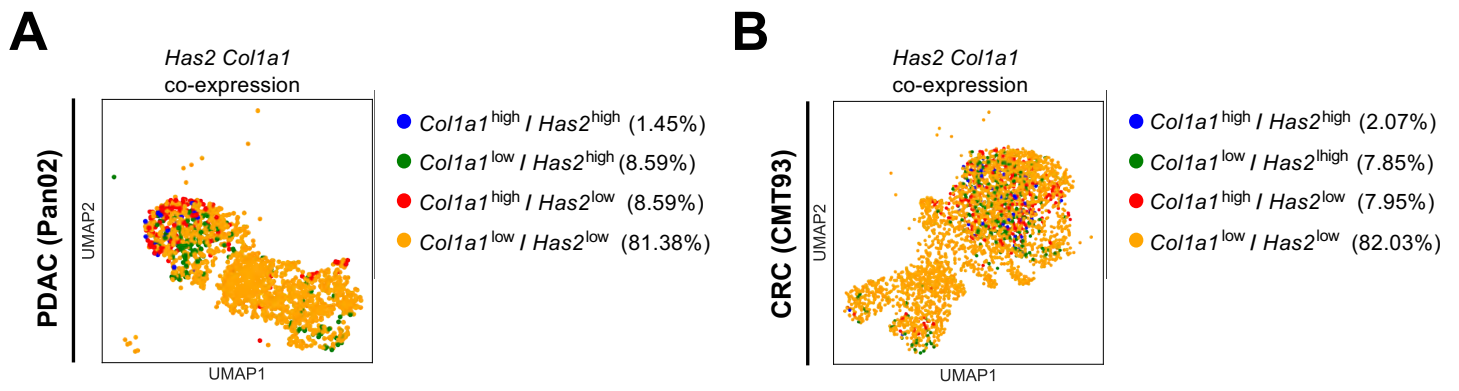

**Fig. S10 | ScRNA-seq analysis of *Col1a1* and *Has2* co-expression in myCAF. A-B.** UMAPs showing co-expression of *Has2* and *Col1a1* within myCAF populations in Pan02 (A) and CMT93 (B) metastasis models. Top 10% of each population is considered 'High'.

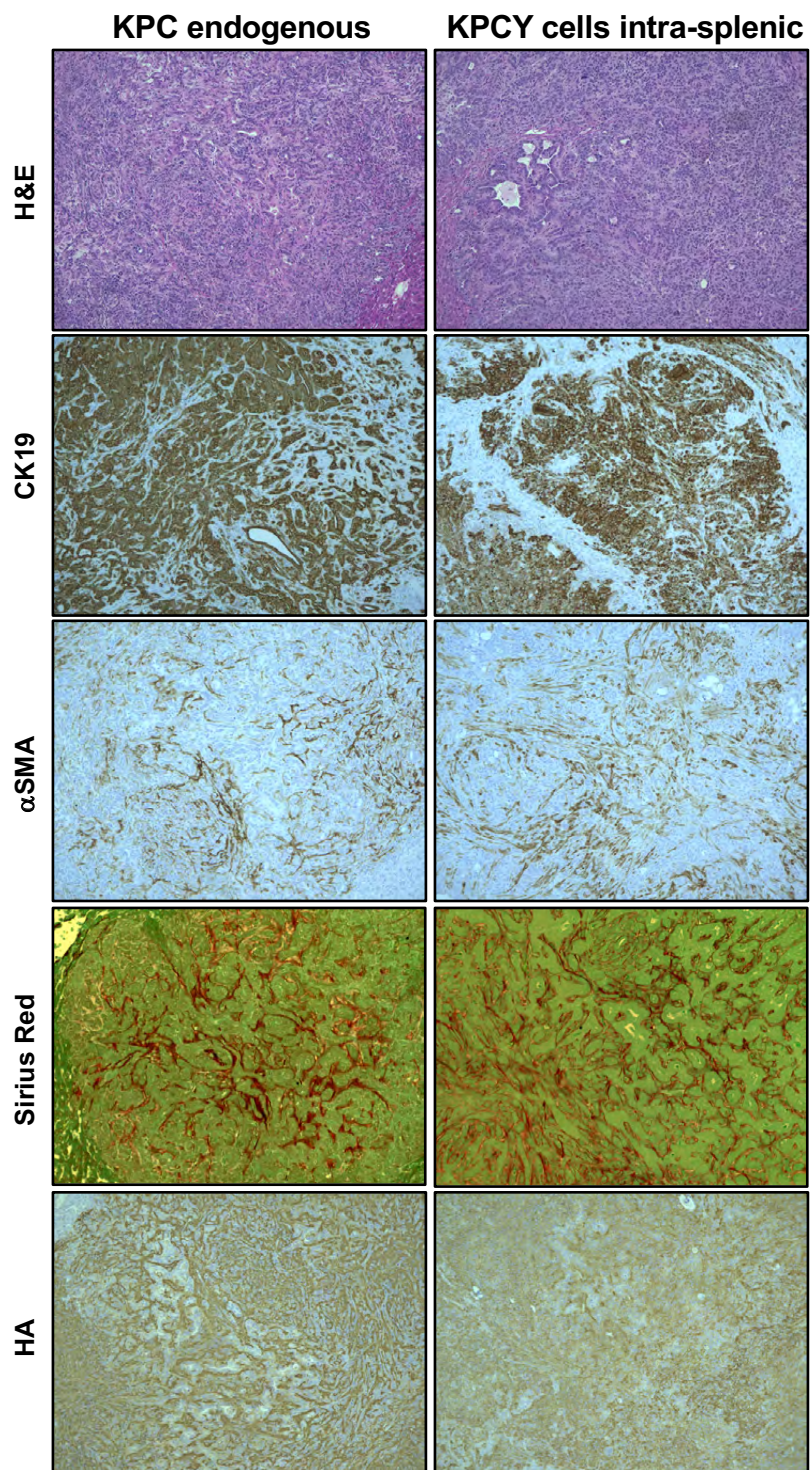

**Fig. S11 | Comparison of endogenous KPC model with intra-splenic injected KPCY cells.** Histological comparison of liver metastasis in endogenous KPC model with intra-splenic injection of KPCY cells in the liver. Scale bars, 100 $\mu$ m

**Table S1. Cell marker genes for cell population identification and CAF subpopulations markers.**

| Mouse                 | Col1a1  | Col1a2 | Col3a1  | C1s1  | Acta2 | C1ra  | Serpinf1 | Pdgfrb | Col12a1  |       |
|-----------------------|---------|--------|---------|-------|-------|-------|----------|--------|----------|-------|
| <b>PanCAF</b>         | Col1a1  | Col1a2 | Col3a1  | C1s1  | Acta2 | C1ra  | Serpinf1 | Pdgfrb | Col12a1  |       |
| <b>HSC-CAF</b>        | Lrat    | Des    | Colec11 | Rgs5  | Cygb  | Ednra | Frzb     | Lum    | Ndufa412 | Sept4 |
| <b>PF-CAF</b>         | Msln    | Upk1b  | Upk3b   | Gpm6a |       |       |          |        |          |       |
| <b>Tumor</b>          | Krt19   | Epcam  |         |       |       |       |          |        |          |       |
| <b>Endothelial</b>    | Kdr     | vWf    | Pecam1  |       |       |       |          |        |          |       |
| <b>Hepatocytes</b>    | Alb     | Ttr    |         |       |       |       |          |        |          |       |
| <b>Myeloid</b>        | Adgre1  | Cd68   | Cd52    | Ilgam |       |       |          |        |          |       |
| <b>Lymphoid</b>       | Prprcap | Cd3e   | Cd2     | Cd19  |       |       |          |        |          |       |
| <b>Cholangiocytes</b> | Sctr    | Hnf1b  | Krt19   | Epcam |       |       |          |        |          |       |

| MOUSE myCAF | Atxn10   | Col12a1 | Ctla2a  | Fbln1   | H1f0    | Ltpb2   | Ndufa412 | Pla1a    | Rnf149  | Slc7a2   | Tnc     |        |
|-------------|----------|---------|---------|---------|---------|---------|----------|----------|---------|----------|---------|--------|
|             | Avp1     | Col15a1 | Ctnx1   | Fbln2   | Heyl    | Lxn     | Nkd2     | Pla2g16  | Rnf19b  | Slc7a5   | Tnfaip2 |        |
|             | B4galnt1 | Col1a1  | Cx3cl1  | Fbn2    | Hs6st2  | Maged2  | Nrep     | Plat     | Runx1   | Smco4    | Tppp3   |        |
|             | Bhlhe41  | Col1a2  | Cxcl14  | Fgfr1   | Htra1   | Map1b   | Nrp2     | Plaur    | S100a16 | Smim3    | Tsc22d3 |        |
|             | Ace      | Bmp1    | Col3a1  | Cyp51   | Fkbp11  | Igfbp5  | Mapkapk3 | Nuak1    | Plod2   | S100a4   | Sox4    | Ttli5  |
|             | Acot7    | Bpgm    | Col4a5  | Dap     | Frem1   | Igsf3   | Mdfi     | Ociad2   | Pip2    | Sac3d1   | Sparcl1 | Tubb2a |
|             | Acta2    | Capg    | Col5a2  | Dbp     | Fst     | Impdh1  | Mdk      | Olfm12b  | Ppp5    | Scpep1   | Specc1  | Tubb3  |
|             | Actg2    | Cd59a   | Col5a3  | Ddah1   | Fstl1   | Inhba   | Medag    | P4ha2    | Pmepa1  | Sdc1     | Spp1    | Tyms   |
|             | Adam19   | Cd9     | Col6a2  | Dpysl3  | Fstl3   | Itm2a   | Meox1    | Pafah1b3 | Podxl2  | Serf1    | Srpx    | Uck2   |
|             | Adcy7    | Cd93    | Col7a1  | Ebf1    | Fxyd5   | Kctd11  | Mfap2    | Palld    | Prrx1   | Serpine2 | Stc2    | Vcan   |
|             | Ahnak2   | Cda     | Col8a1  | Egln3   | Fxyd6   | Kdelr3  | Mfap4    | Pcbp4    | Prss35  | Serpinf1 | Stk17b  | Vegfa  |
|             | AK1      | Cdh11   | Colec12 | Emp1    | Fzd1    | Kif26b  | Mgll     | Pdgfrl   | Ptgfrn  | Sesn3    | Sulf1   | Vmp1   |
|             | Akr1b8   | Cdkn2a  | Comtd1  | Eno1    | Gapdh   | Kremen1 | Mgp      | Pdlim3   | Ptk7    | Sfrp1    | Tfpi2   | Wisp1  |
|             | Aldh1a2  | Cdkn2b  | Copz2   | Enpp1   | Gas7    | Lama4   | Mical2   | Pdzrn3   | Ptn     | Sh3bgrl3 | Tgfb3   | Wnt11  |
|             | Ank      | Cercam  | Cot11   | Etv4    | Gm15867 | Lef1    | Minos1   | Pgam1    | Ptprb   | Sh3pxd2b | Thy1    | Zswim7 |
|             | Ankrd37  | Ch25h   | Cox4i2  | Evl     | Gng11   | Lefty1  | Mmp14    | Pgf      | Rab7b   | Shisa4   | Thy1    |        |
|             | Anpep    | Chst11  | Cpxm2   | Fam198b | Gpbar1  | Lgals1  | Mmp2     | Pgk1     | Rap2b   | Siva1    | Timp1   |        |
|             | Aoc1     | Chst2   | Crlf1   | Fam20a  | Gpc1    | Lgi2    | Mtch1    | Piezo2   | Rapgef4 | Slc16a3  | Tm4sf1  |        |
|             | Apol9a   | Clec11a | Csrp2   | Fam20c  | Gpm6b   | Lhfp2   | Nbl1     | Pik3ip1  | Rgs16   | Slc27a1  | Tmem2   |        |
|             | Aprt     | Clmp    | Cthrc1  | Fam69b  | Gpr153  | Lsp1    | Ncam1    | Pkm      | Rgs19   | Slc39a14 | Tmem45a |        |

| MOUSE iCAF | Angptl6  | C2       | Cyp27a1  | Ephb4       | Gns     | Ifnar2   | Lrrc4c   | Nrxn1  | Rasgef1b | Slc35d1   | Tmem51   |           |
|------------|----------|----------|----------|-------------|---------|----------|----------|--------|----------|-----------|----------|-----------|
|            | Ank3     | C4b      | Cyr61    | Etnk1       | Gpat2   | Igf1r    | Ltpb1    | Nrxn2  | Rasgrp2  | Slc40a1   | Tmem56   |           |
|            | Ankrd55  | C6       | Cysltr1  | Ets1        | Gpc4    | Ilgp1    | Ly6e     | Ntf3   | Rasl11a  | Slc4a8    | Tmem9b   |           |
|            | Aard     | Ano1     | Cachd1   | D1Erttd622e | Ets2    | Grap     | Il10rb   | Macf1  | Ntm      | Rbfox3    | Slc9a3r2 | Tmtc2     |
|            | Abcc9    | Apoc1    | Cadm3    | H30019H16R  | Eva1b   | Gstm1    | Il11ra1  | Man1a  | Ntn1     | Rbm46     | Slco2b1  | Tnfrsf11b |
|            | Abi3bp   | Apoe     | Calcr1   | Daam2       | Fam171b | Gstt1    | Il6st    | Man2a1 | P2ry14   | Rbpms     | Slco3a1  | Tnfrsf1b  |
|            | Ablim2   | Apold1   | Camk1d   | Dapk1       | Fam26f  | H2-D1    | Itga1    | Map4k3 | P3h2     | Rcsd1     | Slmap    | Tnfrsf21  |
|            | Acap1    | Arap2    | Ccbe1    | Dapk2       | Fam49a  | H2-K1    | Itga2b   | Marcks | Pam      | Reln      | Smad6    | Tns1      |
|            | Acer2    | Arhgap24 | Ccdc3    | Dcdc2a      | Fam84a  | H2-Q4    | Itga9    | Matn2  | Papss2   | Rem1      | Smapg    | Tns2      |
|            | Acs15    | Arhgap42 | Ccdc68   | Dcn         | Fbln5   | H2-Q6    | Itgb3    | Mbd2   | Parp14   | Rgl1      | Smpd13a  | Tnxb      |
|            | Actn4    | Arhgef6  | Cd302    | Ddr2        | Fcna    | H2-Q7    | Itih3    | Mertk  | Pde1a    | Rgs2      | Sntg1    | Trib2     |
|            | Acvr2a   | Arid5b   | Cdc42ep4 | Dennd2a     | Fermt2  | H6pd     | Itih4    | Metrn  | Pde3a    | Rgs4      | Socs3    | Trim30a   |
|            | Adam23   | Arrb1    | Cdh2     | Des         | Fgfr2   | Hand2    | Itm2c    | Mndal  | Pdgfra   | Rgs5      | Sod3     | Trp53i11  |
|            | Adamts1  | Art3     | Cdk18    | Dmd         | Fhl1    | Hdac7    | Itprilp1 | Ms4a4d | Pear1    | Rhobtb1   | Sorbs1   | Tshz2     |
|            | Adamts10 | Arvcf    | Cebpb    | Dock8       | Filip1l | Hes1     | Jade2    | Mt1    | Phactr2  | Rnaset2b  | Sox5     | Tspan7    |
|            | Adamts13 | Astn2    | Chst15   | Dse         | Fos     | Hexim1   | Jun      | Mt2    | Pim1     | Rock2     | Sprn     | Vipr1     |
|            | Adamts5  | Atp1a4   | Cited2   | Dusp1       | Fosb    | Hgf      | Junb     | Mtus1  | Pim3     | Rspo3     | Ssfa2    | Vstm4     |
|            | Adamts12 | AW112010 | Cks2     | Dusp10      | Foxf1   | Hhip     | Jup      | Mustn1 | Pkia     | Rtn1      | St3gal4  | Wipf1     |
|            | Adap2    | B2m      | C1ca3a1  | Ece1        | Frzb    | Hlx      | Kcnp3    | Myc    | Pla2r1   | Rtn4r1l   | Steap4   | Xdh       |
|            | Adap2os  | Bambi    | Clec14a  | Ecm1        | G0s2    | Hmcn1    | Kcnj8    | Mylip  | Plekha6  | Rxra      | Stim1    | Zbtb16    |
|            | Adgrl1   | Bcl2l1   | Clstn3   | Ednra       | Gab1    | Hpse     | Klf15    | Mylk   | Plscr4   | Ryk       | Susd2    | Zbtb20    |
|            | Adm      | Bco1     | Col14a1  | Ednrb       | Gabra3  | Hs3st3a1 | Kif9     | Myo18a | Plvap    | Scarb1    | Syde1    | Zfp36     |
|            | Adora2a  | Bcr      | Colec10  | Efemp1      | Gdf10   | Hs3st3b1 | Ktn1     | Myo1b  | Plxnc1   | Sdc4      | Syt9     | Zfp361l   |
|            | Adra2b   | Birc2    | Colec11  | Egr1        | Gdf2    | Hsd11b1  | Lama1    | Ncoa7  | Ppp1r14a | Selenbp1  | Tbx20    | Zfp703    |
|            | Afap112  | Birc3    | Cp       | Ehbp1       | Gem     | Icam1    | Ldlrap1  | Nfia   | Prelp    | Sema3d    | Tcf21    |           |
|            | Agtr1a   | Bmp10    | Cped1    | Ehd3        | Ggt5    | Id3      | Lgals3bp | Nfkb1a | Prex2    | Sema4b    | Tgfb1    |           |
|            | Agtrap   | Bmp2     | Cpne8    | Eif4e3      | Gja4    | Ier2     | Lhx2     | Ngf    | Prss23   | Sema6d    | Tgfb3    |           |
|            | Alcam    | Bmp5     | Crip2    | Emilin1     | Gm10600 | Ifi203   | Lifr     | Ngfr   | Ptfr     | Serpina3g | Tinagl1  |           |
|            | Aldh1a1  | Bmyc     | Csf1     | Eng         | Gm12216 | Ifi2712a | Lipa     | Nkd1   | Pth1r    | Serping1  | Tmem141  |           |
|            | Aldh1a3  | Bok      | Ctso     | Enpp5       | Gm12840 | Ifih1    | Lrat     | Notch1 | Ptprk    | Sft2d2    | Tmem176a |           |
|            | Aldh2    | Btg2     | Cxcl12   | Epas1       | Gm13889 | Ifit3    | Lrp4     | Npr3   | Ramp1    | Sgk1      | Tmem178  |           |
|            | Alpl     | C1ra     | Cygb     | Epb4112     | Gm14964 | Ifitm1   | Lrp5     | Nr1h4  | Ramp2    | Shisa3    | Tmem204  |           |
|            | Angptl2  | C1s1     | Cyp20a1  | Epha2       | Gm37800 | Ifitm2   | Lrrc32   | Nr1h5  | Raph1    | Slc29a1   | Tmem47   |           |

| MOUSE mesCAF | Adgrd1 | Cd2ap | Flrt2 | Igfbp6 | Mmd | Rbbp8 | Slc9a3r1 | Tmem98 |
|--------------|--------|-------|-------|--------|-----|-------|----------|--------|
|              | Adgrd1 | Cd2ap | Flrt2 | Igfbp6 | Mmd | Rbbp8 | Slc9a3r1 | Tmem98 |

|         |        |         |        |        |          |          |           |
|---------|--------|---------|--------|--------|----------|----------|-----------|
| Angptl7 | Celf2  | Fth1    | Il18   | Msln   | Rspo1    | Slpi     | Tnfaip3   |
| Anxa3   | Cpe    | Gas6    | Krt18  | Ndr1   | S100a1   | Smpd3    | Tnfrsf12a |
| Atp1b1  | Cxadr  | Gm20186 | Krt7   | Ndufa4 | Saa3     | Snrgp    | Trf       |
| Bicd1   | Dab2   | Gm8186  | Krt8   | Nkain4 | Sbsn     | Spint2   | Ucp2      |
| C3      | Ddr1   | Gpc3    | Ldhd   | Pdgfc  | Serpib6b | Stmn1    | Upk1b     |
| Cd151   | Ezr    | Gpm6a   | Lgals3 | Pdpn   | Shb      | Tcea3    | Upk3b     |
| Cd200   | Fbxo33 | Hspb1   | Lrrn4  | Rab11a | Slc39a8  | Tmem151a | Wt1       |

#### HUMAN

|                        |        |         |         |       |        |          |          |        |          |
|------------------------|--------|---------|---------|-------|--------|----------|----------|--------|----------|
| <b>PanCAF</b>          | COL1A1 | COL1A2  | COL3A1  | C1S   | ACTA2  | C1R      | SERPINF1 | PDGFRB |          |
| <b>HSC</b>             | RGS5   | LUM     | COLEC11 | DCN   | PDGFRB | GEM      | TAGLN    | CYGB   | SERPINF1 |
|                        | EDNRA  | EMILIN1 | FOXS1   | FRZB  | HEYL   | NDUFA4L2 | NOTCH3   | SEPT4  | COL14A1  |
| <b>PF</b>              | MSLN   | UPK1B   | KRT19   | SLPI  |        |          |          |        |          |
| <b>Tumor</b>           | KRT19  | EPCAM   |         |       |        |          |          |        |          |
| <b>Endothelial</b>     | KDR    | VWF     | ERG     |       |        |          |          |        |          |
| <b>Hepatocyte-like</b> | ALB    | TTR     |         |       |        |          |          |        |          |
| <b>T cell</b>          | CD3E   | CD3D    | CD3G    | CD8A  |        |          |          |        |          |
| <b>B cell</b>          | CD79A  | CD79B   |         |       |        |          |          |        |          |
| <b>Plasma cell</b>     | JSRP1  | FCRL5   |         |       |        |          |          |        |          |
| <b>Mast cell</b>       | CPA3   | TPSAB1  | KIT     |       |        |          |          |        |          |
| <b>DC-like cell</b>    | ITGAX  |         |         |       |        |          |          |        |          |
| <b>Monocytes</b>       | CD68   | CD74    | CD14    | CSF1R |        |          |          |        |          |
| <b>Macrophaged</b>     | VSIG4  | CD68    | FCGR2A  | CD163 |        |          |          |        |          |

#### HUMAN myCAF

|       |       |        |        |        |        |          |       |        |        |     |
|-------|-------|--------|--------|--------|--------|----------|-------|--------|--------|-----|
| APOD  | CCL11 | COL1A1 | COL1A2 | COL3A1 | COL5A1 | COL6A3   | CTGF  | CTHRC1 | CYP1B1 | FN1 |
| INHBA | ISLR  | LUM    | MMP14  | POSTN  | PTGDS  | SERPINF1 | SFRP2 | SPON2  | VCAN   |     |

#### HUMAN iCAF

|         |        |      |         |       |       |         |          |      |      |
|---------|--------|------|---------|-------|-------|---------|----------|------|------|
| ADAMTS4 | AGT    | APOE | ARHGDI1 | CCL19 | CCL21 | COLEC11 | CPE      | GEM  | GJA4 |
| GPX3    | HIGD1B | IL6  | ISYNA1  | LHFP  | MAP1B | MT1A    | NDUFA4L2 | PDK4 | RGS5 |

#### HUMAN mesCAF

|         |         |        |          |         |          |           |         |               |        |
|---------|---------|--------|----------|---------|----------|-----------|---------|---------------|--------|
| ANXA1   | ANXA2   | BDKRB1 | C19orf33 | C3      | CALB2    | CCDC80    | CFB     | CRABP2        |        |
| CXCL1   | CXCL6   | EFEMP1 | EGFL6    | EMP3    | EZR      | HMOX1     | HP      | HSPA6         |        |
| IFI27   | IGFBP6  | ITLN1  | KRT18    | KRT19   | KRT8     | LINC01133 | LOX     | MT1E          |        |
| MT1G    | MT1X    | MXRA5  | PDPN     | PLA2G2A | PRG4     | PRSS23    | PTGIS   | RP11-572C15.6 |        |
| S100A10 | S100A16 | S100A6 | SAA1     | SAA2    | SERPINE2 | SH3BGRL3  | SLC12A8 | SLPI          | TM4SF1 |

**Table S2. Top HSC-CAF/tumor interactions in CRC and PDAC liver metastasis.**

| Combined Rank<br>Pan02, KPCY and<br>CMT93 | Interacting<br>ligand-receptor pair | Rank Pan02 | Significant means<br>HSC-CAF/tumor<br>interactions (Pan02) | Rank KPCY | Significant means<br>HSC-CAF/tumor<br>interactions (KPCY) | Rank CMT93 | Significant means<br>HSC-CAF/tumor<br>interactions (CMT93) |
|-------------------------------------------|-------------------------------------|------------|------------------------------------------------------------|-----------|-----------------------------------------------------------|------------|------------------------------------------------------------|
| 1                                         | COL3A1_DDR1                         | 2          | 37.435                                                     | 3         | 23.842                                                    | 1          | 41.029                                                     |
| 2                                         | COL3A1_a2b1 complex                 | 3          | 37.405                                                     | 1         | 24.078                                                    | 3          | 40.783                                                     |
| 3                                         | COL3A1_DDR2                         | 1          | 37.484                                                     | 4         | 23.626                                                    | 2          | 40.818                                                     |
| 4                                         | COL3A1_a1b1 complex                 | 4          | 37.391                                                     | 2         | 23.861                                                    | 4          | 40.757                                                     |
| 5                                         | <b>COL1A1_DDR1</b>                  | 10         | <b>17.063</b>                                              | 7         | <b>20.402</b>                                             | 5          | <b>26.889</b>                                              |
| 6                                         | <b>COL1A1_a2b1 complex</b>          | 11         | <b>17.033</b>                                              | 5         | <b>20.637</b>                                             | 7          | <b>26.643</b>                                              |
| 7                                         | <b>COL1A1_DDR2</b>                  | 9          | <b>17.112</b>                                              | 8         | <b>20.186</b>                                             | 6          | <b>26.677</b>                                              |
| 8                                         | <b>COL1A1_a1b1 complex</b>          | 12         | <b>17.019</b>                                              | 6         | <b>20.42</b>                                              | 8          | <b>26.617</b>                                              |
| 9                                         | COL1A2_DDR1                         | 6          | 18.767                                                     | 11        | 18.666                                                    | 9          | 24.247                                                     |
| 10                                        | COL1A2_a2b1 complex                 | 7          | 18.737                                                     | 9         | 18.901                                                    | 11         | 24.001                                                     |
| 11                                        | COL1A2_DDR2                         | 5          | 18.816                                                     | 12        | 18.45                                                     | 10         | 24.036                                                     |
| 12                                        | COL1A2_a1b1 complex                 | 8          | 18.724                                                     | 10        | 18.684                                                    | 12         | 23.975                                                     |
| 13                                        | FN1_a3b1 complex                    | 14         | 3.617                                                      | 13        | 11.382                                                    | 14         | 3.842                                                      |
| 14                                        | COL14A1_a2b1 complex                | 13         | 6.102                                                      | 21        | 3.722                                                     | 13         | 4.727                                                      |
| 15                                        | FN1_a2b1 complex                    | 17         | 3.418                                                      | 14        | 11.231                                                    | 16         | 3.626                                                      |
| 16                                        | FN1_a2Bb3 complex                   | 15         | 3.508                                                      | 16        | 10.776                                                    | 17         | 3.569                                                      |
| 17                                        | FN1_a4b7 complex                    | 18         | 3.381                                                      | 15        | 10.786                                                    | 15         | 3.677                                                      |
| 18                                        | COL5A2_DDR1                         | 22         | 2.585                                                      | 20        | 3.861                                                     | 18         | 3.546                                                      |
| 19                                        | COL6A3_a2b1 complex                 | 16         | 3.493                                                      | 22        | 3.523                                                     | 22         | 3.108                                                      |
| 20                                        | COL4A1_DDR1                         | 20         | 2.826                                                      | 18        | 6.358                                                     | 24         | 2.669                                                      |
| 21                                        | COL5A2_a2b1 complex                 | 23         | 2.555                                                      | 19        | 4.097                                                     | 20         | 3.3                                                        |
| 22                                        | COL4A1_a2b1 complex                 | 21         | 2.796                                                      | 17        | 6.593                                                     | 26         | 2.423                                                      |
| 23                                        | LAMP1_FAM3C                         | 19         | 3.33                                                       | 29        | 2.094                                                     | 19         | 3.487                                                      |
| 24                                        | COL5A1_DDR1                         | 25         | 2.157                                                      | 26        | 3.179                                                     | 25         | 2.519                                                      |
| 25                                        | COL5A1_a2b1 complex                 | 26         | 2.127                                                      | 24        | 3.414                                                     | 27         | 2.273                                                      |
| 26                                        | THBS1_a3b1 complex                  | 30         | 1.803                                                      | 30        | 1.969                                                     | 21         | 3.231                                                      |
| 27                                        | COL6A2_a2b1 complex                 | 24         | 2.493                                                      | 33        | 1.636                                                     | 31         | 1.837                                                      |
| 28                                        | <b>HGF_CD44</b>                     | 29         | <b>1.864</b>                                               | 28        | <b>2.366</b>                                              | 34         | <b>1.453</b>                                               |
| 29                                        | COL4A2_a2b1 complex                 | 36         | 1.499                                                      | 25        | 3.311                                                     | 33         | 1.548                                                      |
| 30                                        | COL4A2_DDR1                         | 35         | 1.529                                                      | 27        | 3.076                                                     | 32         | 1.794                                                      |
| 31                                        | MMP2_aVb3 complex                   | 27         | 1.958                                                      | 45        | 0.915                                                     | 23         | 2.888                                                      |
| 32                                        | TNFSF12_TNFRSF12A                   | 33         | 1.612                                                      | 34        | 1.578                                                     | 28         | 2.243                                                      |
| 33                                        | COL15A1_a2b1 complex                | 40         | 0.971                                                      | 23        | 3.51                                                      | 40         | 0.985                                                      |
| 34                                        | LGALS9_CD44                         | 37         | 1.194                                                      | 32        | 1.738                                                     | 37         | 1.333                                                      |
| 35                                        | IGF1_IGF1R                          | 28         | 1.908                                                      | 50        | 0.756                                                     | 29         | 2.081                                                      |
| 36                                        | IGF1_a6b4 complex                   | 31         | 1.775                                                      | 42        | 1.051                                                     | 35         | 1.399                                                      |
| 37                                        | LAMC1_a6b1 complex                  | 38         | 1.01                                                       | 31        | 1.75                                                      | 42         | 0.955                                                      |
| 38                                        | VCAM1_a4b7 complex                  | 34         | 1.598                                                      | 51        | 0.729                                                     | 30         | 1.907                                                      |
| 39                                        | RSPO3_LGR6                          | 32         | 1.695                                                      | 43        | 1.032                                                     | 41         | 0.985                                                      |
| 40                                        | HAS1-HA-ligand_CD44                 | 41         | 0.865                                                      | 40        | 1.187                                                     | 39         | 1.004                                                      |
| 41                                        | LAMC1_a2b1 complex                  | 39         | 1.01                                                       | 37        | 1.269                                                     | 46         | 0.921                                                      |
| 42                                        | FGF2_CD44                           | 44         | 0.735                                                      | 36        | 1.281                                                     | 44         | 0.928                                                      |
| 43                                        | <b>HAS2-HA-ligand_CD44</b>          | 47         | <b>0.626</b>                                               | 35        | <b>1.282</b>                                              | 45         | <b>0.925</b>                                               |
| 44                                        | TNC_aVb6 complex                    | 50         | 0.435                                                      | 44        | 1.012                                                     | 38         | 1.012                                                      |
| 45                                        | MDK_SORL1                           | 46         | 0.675                                                      | 53        | 0.617                                                     | 36         | 1.363                                                      |
| 46                                        | COL12A1_a2b1 complex                | 51         | 0.39                                                       | 46        | 0.906                                                     | 43         | 0.948                                                      |
| 47                                        | LGALS9_MET                          | 45         | 0.713                                                      | 48        | 0.815                                                     | 48         | 0.729                                                      |
| 48                                        | COL8A1_a2b1 complex                 | 52         | 0.368                                                      | 41        | 1.165                                                     | 49         | 0.706                                                      |
| 49                                        | PROS1_TYRO3                         | 42         | 0.856                                                      | 54        | 0.579                                                     | 47         | 0.857                                                      |
| 50                                        | COL16A1_a2b1 complex                | 49         | 0.467                                                      | 47        | 0.837                                                     | 51         | 0.514                                                      |
| 51                                        | TGFB1_aVb6 complex                  | 56         | 0.308                                                      | 39        | 1.229                                                     | 52         | 0.446                                                      |
| 52                                        | COL6A5_a2b1 complex                 | 43         | 0.752                                                      | 55        | 0.522                                                     | 50         | 0.571                                                      |
| 53                                        | COL5A3_a2b1 complex                 | 60         | 0.273                                                      | 38        | 1.238                                                     | 62         | 0.245                                                      |
| 54                                        | COL27A1_a2b1 complex                | 54         | 0.358                                                      | 52        | 0.706                                                     | 55         | 0.328                                                      |
| 55                                        | CSPG4_a3b1 complex                  | 57         | 0.293                                                      | 49        | 0.764                                                     | 57         | 0.296                                                      |
| 56                                        | CADM3_EPB41L1                       | 48         | 0.525                                                      | 63        | 0.222                                                     | 53         | 0.411                                                      |
| 57                                        | COL6A6_a2b1 complex                 | 53         | 0.363                                                      | 57        | 0.484                                                     | 54         | 0.368                                                      |
| 58                                        | EPHB2_EFNB2                         | 55         | 0.346                                                      | 61        | 0.273                                                     | 60         | 0.249                                                      |
| 59                                        | NOTCH1_DLL4                         | 59         | 0.276                                                      | 59        | 0.38                                                      | 59         | 0.251                                                      |
| 60                                        | NOTCH1_JAG2                         | 58         | 0.287                                                      | 58        | 0.422                                                     | 61         | 0.248                                                      |
| 61                                        | <b>HAS2-HA-ligand_HMMR</b>          | 62         | <b>0.236</b>                                               | 62        | <b>0.269</b>                                              | 56         | <b>0.319</b>                                               |
| 62                                        | NRG1_a6b4 complex                   | 64         | 0.157                                                      | 56        | 0.505                                                     | 65         | 0.12                                                       |
| 63                                        | NOTCH3_JAG2                         | 63         | 0.229                                                      | 60        | 0.35                                                      | 63         | 0.217                                                      |
| 64                                        | IL1 receptor inhibitor_IL1          | 65         | 0.11                                                       | 65        | 0.175                                                     | 58         | 0.285                                                      |
| 65                                        | EPHB6_EFNB2                         | 61         | 0.267                                                      | 64        | 0.211                                                     | 64         | 0.187                                                      |
| 66                                        | NOTCH4_JAG2                         | 66         | 0.025                                                      | 66        | 0.122                                                     | 66         | 0.058                                                      |



**Table S3. 43 novel CellPhoneDB ligand-receptor interactions.**

| Ligand-receptor | Ligand Name    | Ligand ID | Receptor name | Receptor ID | PMID Reference                                                    |
|-----------------|----------------|-----------|---------------|-------------|-------------------------------------------------------------------|
| COL1A1 - DDR1   | COL1A1         | P02452    | DDR1          | Q08345      | PMID: 32047176 ; PMID: 32244515 ; PMID: 28590245 ; PMID: 31004686 |
| COL1A2 - DDR1   | COL1A2         | P08123    | DDR1          | Q08345      | PMID: 32047176 ; PMID: 32244515 ; PMID: 28590245 ; PMID: 31004686 |
| COL2A1 - DDR1   | COL2A1         | P02458    | DDR1          | Q08345      | PMID: 33234027 ; PMID: 31004686                                   |
| COL3A1 - DDR1   | COL3A1         | P02461    | DDR1          | Q08345      | PMID: 28743124 ; PMID: 31004686 ; PMID: 21421911                  |
| COL5A1 - DDR1   | COL5A1         | P20908    | DDR1          | Q08345      | PMID: 33234027 ; PMID: 31004686 ; PMID: 23861322                  |
| COL5A2 - DDR1   | COL5A2         | P05997    | DDR1          | Q08345      | PMID: 23861322                                                    |
| COL5A3 - DDR1   | COL5A3         | P25940    | DDR1          | Q08345      | PMID: 23861322                                                    |
| COL11A1 - DDR1  | COL11A1        | P12107    | DDR1          | Q08345      | PMID: 31717573                                                    |
| COL11A2 - DDR1  | COL11A2        | P13942    | DDR1          | Q08345      | PMID: 31717573                                                    |
| COL1A1 - DDR2   | COL1A1         | P02452    | DDR2          | Q16832      | PMID: 31699892 ; PMID: 21421911                                   |
| COL1A2 - DDR2   | COL1A2         | P08123    | DDR2          | Q16832      | PMID: 31699892 ; PMID: 21421911                                   |
| COL2A1 - DDR2   | COL2A1         | P02458    | DDR2          | Q16832      | PMID: 31958497                                                    |
| COL3A1 - DDR2   | COL3A1         | P02461    | DDR2          | Q16832      | PMID: 28743124 ; PMID: 21421911                                   |
| COL5A1 - DDR2   | COL5A1         | P20908    | DDR2          | Q16832      | PMID: 33234027 ; PMID: 23861322                                   |
| COL5A2 - DDR2   | COL5A2         | P05997    | DDR2          | Q16832      | PMID: 23861322                                                    |
| COL5A3 - DDR2   | COL5A3         | P25940    | DDR2          | Q16832      | PMID: 23861322                                                    |
| COL11A1 - DDR2  | COL11A1        | P12107    | DDR2          | Q16832      | PMID: 29769618                                                    |
| COL11A2 - DDR2  | COL11A2        | P13942    | DDR2          | Q16832      | PMID: 31717573                                                    |
| COL4A1 - DDR1   | COL4A1         | P02462    | DDR1          | Q08345      | PMID: 23861322                                                    |
| COL4A2 - DDR1   | COL4A2         | P08572    | DDR1          | Q08345      | PMID: 23861322                                                    |
| COL4A3 - DDR1   | COL4A3         | Q01955    | DDR1          | Q08345      | PMID: 23861322                                                    |
| COL4A4 - DDR1   | COL4A4         | P53420    | DDR1          | Q08345      | PMID: 23861322                                                    |
| COL4A5 - DDR1   | COL4A5         | P29400    | DDR1          | Q08345      | PMID: 23861322                                                    |
| COL4A6 - DDR1   | COL4A6         | Q14031    | DDR1          | Q08345      | PMID: 23861322                                                    |
| COL10A1 - DDR2  | COL10A1        | Q03692    | DDR2          | Q16832      | PMID: 33324550                                                    |
| HAS1-HA - CD44  | HAS1-HA-ligand | Undefined | CD44          | P16070      | PMID: 24406795 ; PMID: 31276783 ; PMID: 18661346                  |
| HAS1-HA - HMMR  | HAS1-HA-ligand | Undefined | HMMR          | O75330      | PMID: 31276783 ; PMID: 24668563                                   |
| HAS1-HA - ICAM1 | HAS1-HA-ligand | Undefined | ICAM1         | P05362      | PMID: 16449361 ; PMID: 8867647                                    |
| HAS1-HA - TLR4  | HAS1-HA-ligand | Undefined | TLR4          | O00206      | PMID: 21248167 ; PMID: 31484704                                   |
| HAS1-HA - TLR2  | HAS1-HA-ligand | Undefined | TLR2          | O60603      | PMID: 21248167 ; PMID: 28682809 ; PMID: 20534434                  |
| HAS1-HA - LYVE1 | HAS1-HA-ligand | Undefined | LYVE1         | Q9Y5Y7      | PMID: 12554094 ; PMID: 19033446 ; PMID: 30054204                  |
| HAS2-HA - CD44  | HAS2-HA-ligand | Undefined | CD44          | P16070      | PMID: 24406795 ; PMID: 31276783 ; PMID: 18661346                  |
| HAS2-HA - HMMR  | HAS2-HA-ligand | Undefined | HMMR          | O75330      | PMID: 31276783 ; PMID: 24668563 ; PMID: 30365189                  |
| HAS2-HA - ICAM1 | HAS2-HA-ligand | Undefined | ICAM1         | P05362      | PMID: 16449361 ; PMID: 8867647                                    |
| HAS2-HA - TLR4  | HAS2-HA-ligand | Undefined | TLR4          | O00206      | PMID: 21248167 ; PMID: 31484704                                   |
| HAS2-HA - TLR2  | HAS2-HA-ligand | Undefined | TLR2          | O60603      | PMID: 21248167 ; PMID: 28682809 ; PMID: 20534434                  |
| HAS2-HA - LYVE1 | HAS2-HA-ligand | Undefined | LYVE1         | Q9Y5Y7      | PMID: 12554094 ; PMID: 19033446 ; PMID: 30054204                  |
| HAS3-HA - CD44  | HAS3-HA-ligand | Undefined | CD44          | P16070      | PMID: 24406795 ; PMID: 31276783 ; PMID: 18661346                  |
| HAS3-HA - HMMR  | HAS3-HA-ligand | Undefined | HMMR          | O75330      | PMID: 31276783 ; PMID: 24668563 ; PMID: 30365189                  |
| HAS3-HA - ICAM1 | HAS3-HA-ligand | Undefined | ICAM1         | P05362      | PMID: 16449361 ; PMID: 8867647                                    |
| HAS3-HA - TLR4  | HAS3-HA-ligand | Undefined | TLR4          | O00206      | PMID: 21248167 ; PMID: 31484704                                   |
| HAS3-HA - TLR2  | HAS3-HA-ligand | Undefined | TLR2          | O60603      | PMID: 21248167 ; PMID: 28682809 ; PMID: 20534434                  |
| HAS3-HA - LYVE1 | HAS3-HA-ligand | Undefined | LYVE1         | Q9Y5Y7      | PMID: 12554094 ; PMID: 19033446 ; PMID: 30054204                  |

## **SUPPLEMENTARY METHODS**

### **RNA isolation and real-time qPCR**

Total tissue and cell RNA was isolated using TRIZOL and Tissue RNA isolation kit (Roche or Qiagen). RNA (1 µg) was reverse transcribed using TaqMan Reverse transcription reagent kit (Roche). Primers were designed in conjunction with the appropriate ABI probes (Applied Biosystems) and the samples were then used for real-time qPCR performed on PCR on Applied Biosystems™ QuantStudio™ 5 Real-Time PCR System (Applied Biosystems). Absolute values were quantified using relative standard curves, normalized to 18s expression and fold inductions were carried out with respect to livers of Naïve mice.

### **Bulk RNA sequencing**

RNA from ultrapure HSC-CAF and quiescent samples was extracted using the RNeasy Micro or Mini Kit (Qiagen) with on-column DNase digestion accordingly to manufacturer instructions. RNA (RNA integrity number [RIN] >8, as determined by Bioanalyzer 2100, Agilent Technologies) was used to construct libraries using Illumina TruSeq RNA Preparation Kit according to the manufacturer's instructions. 20M paired-end 100bp sequencing was performed using the Illumina NovaSeq 6000 at Columbia Genome Center. RTA (Illumina) was used for base calling and bcl2fastq2 (version 2.19) for converting BCL to fastq format, coupled with adaptor trimming. A pseudoalignment to a kallisto index was created from transcriptomes (Human: GRCh38; Mouse: GRCm38) using kallisto (0.44.0). Differentially expressed genes were tested using DESeq2. Normalization was done internally using DESeq2's specialized algorithm and

normalization to compare across samples, was performed using the TPM (transcripts per million) method.

### **Single-cell RNA sequencing**

Murine single-cell RNA-seq was performed on cells isolated from mice with Pan02 and CMT 93 liver metastasis as described below. Single-cell RNA-seq data from human CRC liver metastasis (1) and NET (2) have been previously published. CAF-enriched but multiple cell populations from Pan02 and CMT93 were obtained following the isolation protocol described above for CAF from Lrat-Cre+ TdTom+ Col1a1-GFP+ mice. In order to obtain CAF-enriched samples along with several other cell populations for CellPhoneDB analysis, we combined Col1a1-GFP+ cells (70%) with the unpurified live cell suspension (30%) by sorting on a BD Aria II Cell Sorter. Mouse tumor specimens were processed as previously described and freshly isolated cells were counted on Countess II automated cell counter (ThermoFisher) and were loaded on a 10x Chromium instrument (10x Genomics). Single-cell RNA-seq libraries were prepared using the Chromium Single Cell 3' v3 Reagent Kit (10x Genomics) according to manufacturer's instructions. 12 cycles of cDNA amplification and 12 cycles of library amplification were performed, and samples were sequenced on an Illumina NovaSeq 6000 Sequencing System at the JP Sulzberger Columbia Genome Center. 10x Genomics Cellranger pipeline was used to process the data. BCL files were demultiplexed with 10x Cell Ranger's mkfastq command and analysis and alignment were performed using Cell Ranger's count command with Cell Ranger's reference mm10. Single-cell count matrices for both mouse and the human samples, were loaded into scanpy AnnData objects (scanpy v1.4.6). QC metrics (total number of counts, number of genes detected, percentage of mitochondrial RNA) was used to identify and remove outliers in the distribution of cells, cells with

high mitochondrial content (>40%) were excluded (3). Each cell was normalized using pool-derived size factors (4) and log-transformed each matrix. Principal component analysis was performed on the resulting matrices (scanpy v1.4.6). To identify cell sub-populations, we employed the Louvain algorithm for community detection (5) with different values for the resolution parameter, analyzing the average Silhouette score across all cells for each clustering (6). Differentially expressed genes were computed using the Wilcoxon Rank-Sum test as implemented in scanpy, and the different populations were labeled based on the genes differentially up-regulated in each population. Cell populations including CAF, hepatocytes, T and B lymphocytes, dendritic cells, endothelial cells, myeloid cells, monocytes and neutrophils, were identified using specific markers genes (Table S1) and confirmed by PanglaoDB (7). Mouse scores for panCAF and CAF subpopulations signatures were computed as previously defined (8). Clusters having at least 50% of cells with positive pan-CAF score were considered further for analysis of CAF subtypes. HSC-CAF and PF-CAF scores were calculated using the HSC and PF signatures in Table S1 and percentages were calculated for each sample. For mouse signatures, within panCAF, CAF subpopulation score distributions were analyzed, and a CAF subpopulation label was assigned to each cell if the corresponding score was higher than 0.125 (to reduce the number of cells with multiple labels). A signature for different CAF subpopulations by selecting differentially expressed genes between the different subpopulations ( $q < 0.05$ ,  $\log\text{-FC} > 1$ ) was computed on single-CAF for each sample and 3 different populations were identified and named as iCAF, myCAF and mesCAF accordingly to their DGE and pathways enrichment as described in Results. The gene signature was analyzed in all cell populations to ensure the signature was specific to the particular CAF subset. Human panCAF and CAF subpopulation signatures were identified in “Human CRC metastasis and Human NET metastasis” datasets using the following procedure.

Literature-defined CAF signatures (8) and the mouse CAF signatures were used to define the cell clusters corresponding to panCAF and CAF subpopulations. panCAF signature was computed by obtaining the differentially expressed genes ( $q < 0.05$ ,  $\log\text{-FC} > 1$ ) in PAN-CAF cluster compared to all other cell types and manually selecting genes with panCAF specific expression. HSC-CAF and PF-CAF were determined as previously described and CAF subpopulations iCAF, myCAF and mesCAF signatures were computed by obtaining the differentially expressed genes ( $q < 0.05$ ,  $\log\text{-FC} > 1$ ) in the respective CAF subpopulation compared to the rest of panCAF and were independently validated by their differential gene expression and GO enrichment analysis (iCAF, myCAF and mesCAF human signatures are shown in Extended Data Table S1). These panCAF and CAF subpopulation signatures were then reapplied to the human sample to obtain and quantify CAF populations as mentioned previously. Notably, no mesCAF population was detected in the human samples.

### **CellPhoneDB Analysis**

CellPhoneDB (9), a curated repository of ligands, receptors, their subunit interactions was used to identify ligand-receptor interactions in the three mouse models and human liver metastasis single cell RNAseq samples. Following identification of different cell types in our scRNA-seq datasets as described above, we followed recommended protocols for preparation of input files using CellPhoneDB v.2.0.0 (9). We updated the original CellPhoneDB repository with 43 novel interactions and 3 complexes curated from literature using ‘cellphonedb database generate’ command (Extended Data Table S3 provides Pubmed IDs with literature documenting the added interactions). All CellPhoneDB statistical analysis were performed with a percentage cell expression threshold of 1%. Cell-cell interactions heatmaps were generated using pheatmap R

package and ligand-receptor interactions were visualized using ggplot2 R package. Top common ligand receptor pairs between HSC-CAF and tumor cells were sorted based on significant means (p value <0.05) shown in Extended Data Table S4.

### **Rheometry**

Tumor samples were extracted from liver specimens using a stainless-steel punch when >8mm, and cylindrical samples were cut manually and the diameter was determined from optical images. Parallel plate shear rheometry was carried out using a Kinexus rheometer (Malvern Panalytical, Westborough, MA). Samples were attached to the top and bottom plates with fibrin glue made by mixing 10  $\mu$ l of 5 mg/ml salmon fibrinogen and 10  $\mu$ l of 150 U/ml salmon thrombin (Sea Run Holdings, Freeport, ME) for each side of the sample. The top plate (8 mm diameter) was lowered until contact was made as determined by the application of 400 Pa normal stress, and the sample was allowed to rest for 5 min to ensure attachment to the metal plates. Shear storage modulus  $G'$ , loss modulus  $G''$ , and normal force were measured by applying a low oscillatory shear strain of 2% at a frequency of 1 rad/sec at room temperature. Simultaneously, samples were subjected to small stepwise axial strains in tension (0, 10, and 20%) followed by compression (-10, -15, -20, and -25%), between which the samples were allowed to relax for 2 min. The equilibrium  $G'$  and  $G''$  after 2 min of relaxation were plotted against axial strain.

Samples were always kept moist during experiments using PBS.

## SUPPLEMENTARY REFERENCES

1. Y. Zhang, J. Song, Z. Zhao, M. Yang, M. Chen, C. Liu, J. Ji, D. Zhu, Single-cell transcriptome analysis reveals tumor immune microenvironment heterogeneity and granulocytes enrichment in colorectal cancer liver metastases. *Cancer Lett* **470**, 84-94 (2020).
2. M. Rao, K. Oh, R. Moffitt, P. Thompson, J. Li, J. Liu, A. Sasson, G. Georgakis, J. Kim, M. Choi, S. Powers, Comparative single-cell RNA sequencing (scRNA-seq) reveals liver metastasis-specific targets in a patient with small intestinal neuroendocrine cancer. *Cold Spring Harb Mol Case Stud* **6**, (2020).
3. T. Ilicic, J. K. Kim, A. A. Kolodziejczyk, F. O. Bagger, D. J. McCarthy, J. C. Marioni, S. A. Teichmann, Classification of low quality cells from single-cell RNA-seq data. *Genome Biol* **17**, 29 (2016).
4. A. T. Lun, K. Bach, J. C. Marioni, Pooling across cells to normalize single-cell RNA sequencing data with many zero counts. *Genome Biol* **17**, 75 (2016).
5. G. J.-L. Blondel VD, Lambiotte R, Lefebvre E. , Fast unfolding of communities in large networks. *J. Stat. Mech. Theory Exp.* **10008:6**, (2008).
6. P. J. Rousseeuw, Silhouettes: a graphical aid to the interpretation and validation of cluster analysis. *Journal of computational and applied mathematics* **20 (1987): 53-65**, (1987).
7. L.-M. G. a. J. L. M. B. r. Oscar Franzén, PanglaoDB: a web server for exploration of mouse and human single-cell RNA sequencing data. *Database* **2019, 1–9**, (2019).
8. E. Elyada, M. Bolisetty, P. Laise, W. F. Flynn, E. T. Courtois, R. A. Burkhart, J. A. Teinor, P. Belleau, G. Biffi, M. S. Lucito, S. Sivajothi, T. D. Armstrong, D. D. Engle, K. H. Yu, Y. Hao, C. L. Wolfgang, Y. Park, J. Preall, E. M. Jaffee, A. Califano, P. Robson, D. A. Tuveson, Cross-Species Single-Cell Analysis of Pancreatic Ductal Adenocarcinoma Reveals Antigen-Presenting Cancer-Associated Fibroblasts. *Cancer Discov* **9**, 1102-1123 (2019).
9. R. Vento-Tormo, M. Efremova, R. A. Botting, M. Y. Turco, M. Vento-Tormo, K. B. Meyer, J. E. Park, E. Stephenson, K. Polanski, A. Goncalves, L. Gardner, S. Holmqvist, J. Henriksson, A. Zou, A. M. Sharkey, B. Millar, B. Innes, L. Wood, A. Wilbrey-Clark, R. P. Payne, M. A. Ivarsson, S. Lisgo, A. Filby, D. H. Rowitch, J. N. Bulmer, G. J. Wright, M. J. T. Stubbington, M. Haniffa, A. Moffett, S. A. Teichmann, Single-cell reconstruction of the early maternal-fetal interface in humans. *Nature* **563**, 347-353 (2018).
